# Supplementary figures and images for: Species Diversity of Penicillium in Southwest China with Discovery of Forty-Three New Species
Source: MDPI journal article supplement (doi:10.3390/jof9121150), 2023-11-28

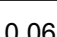

Supplement: s1 [file s1]

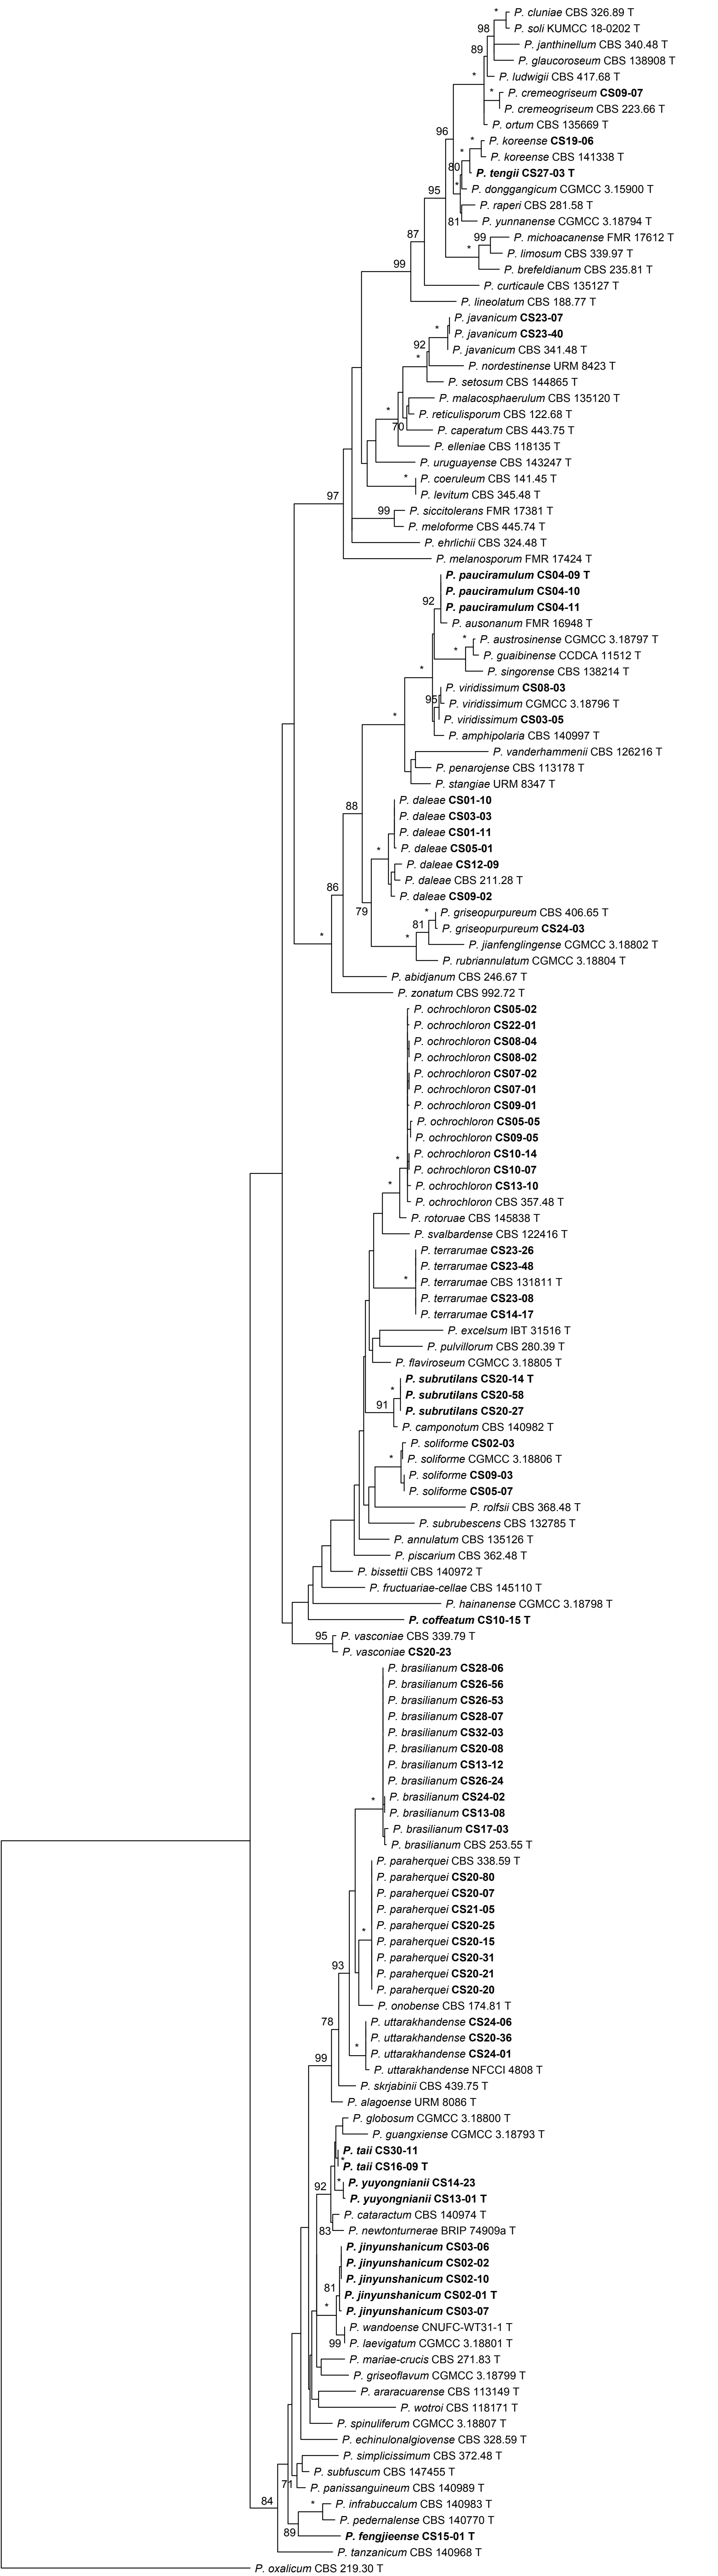

Supplement: s1 [file s1]

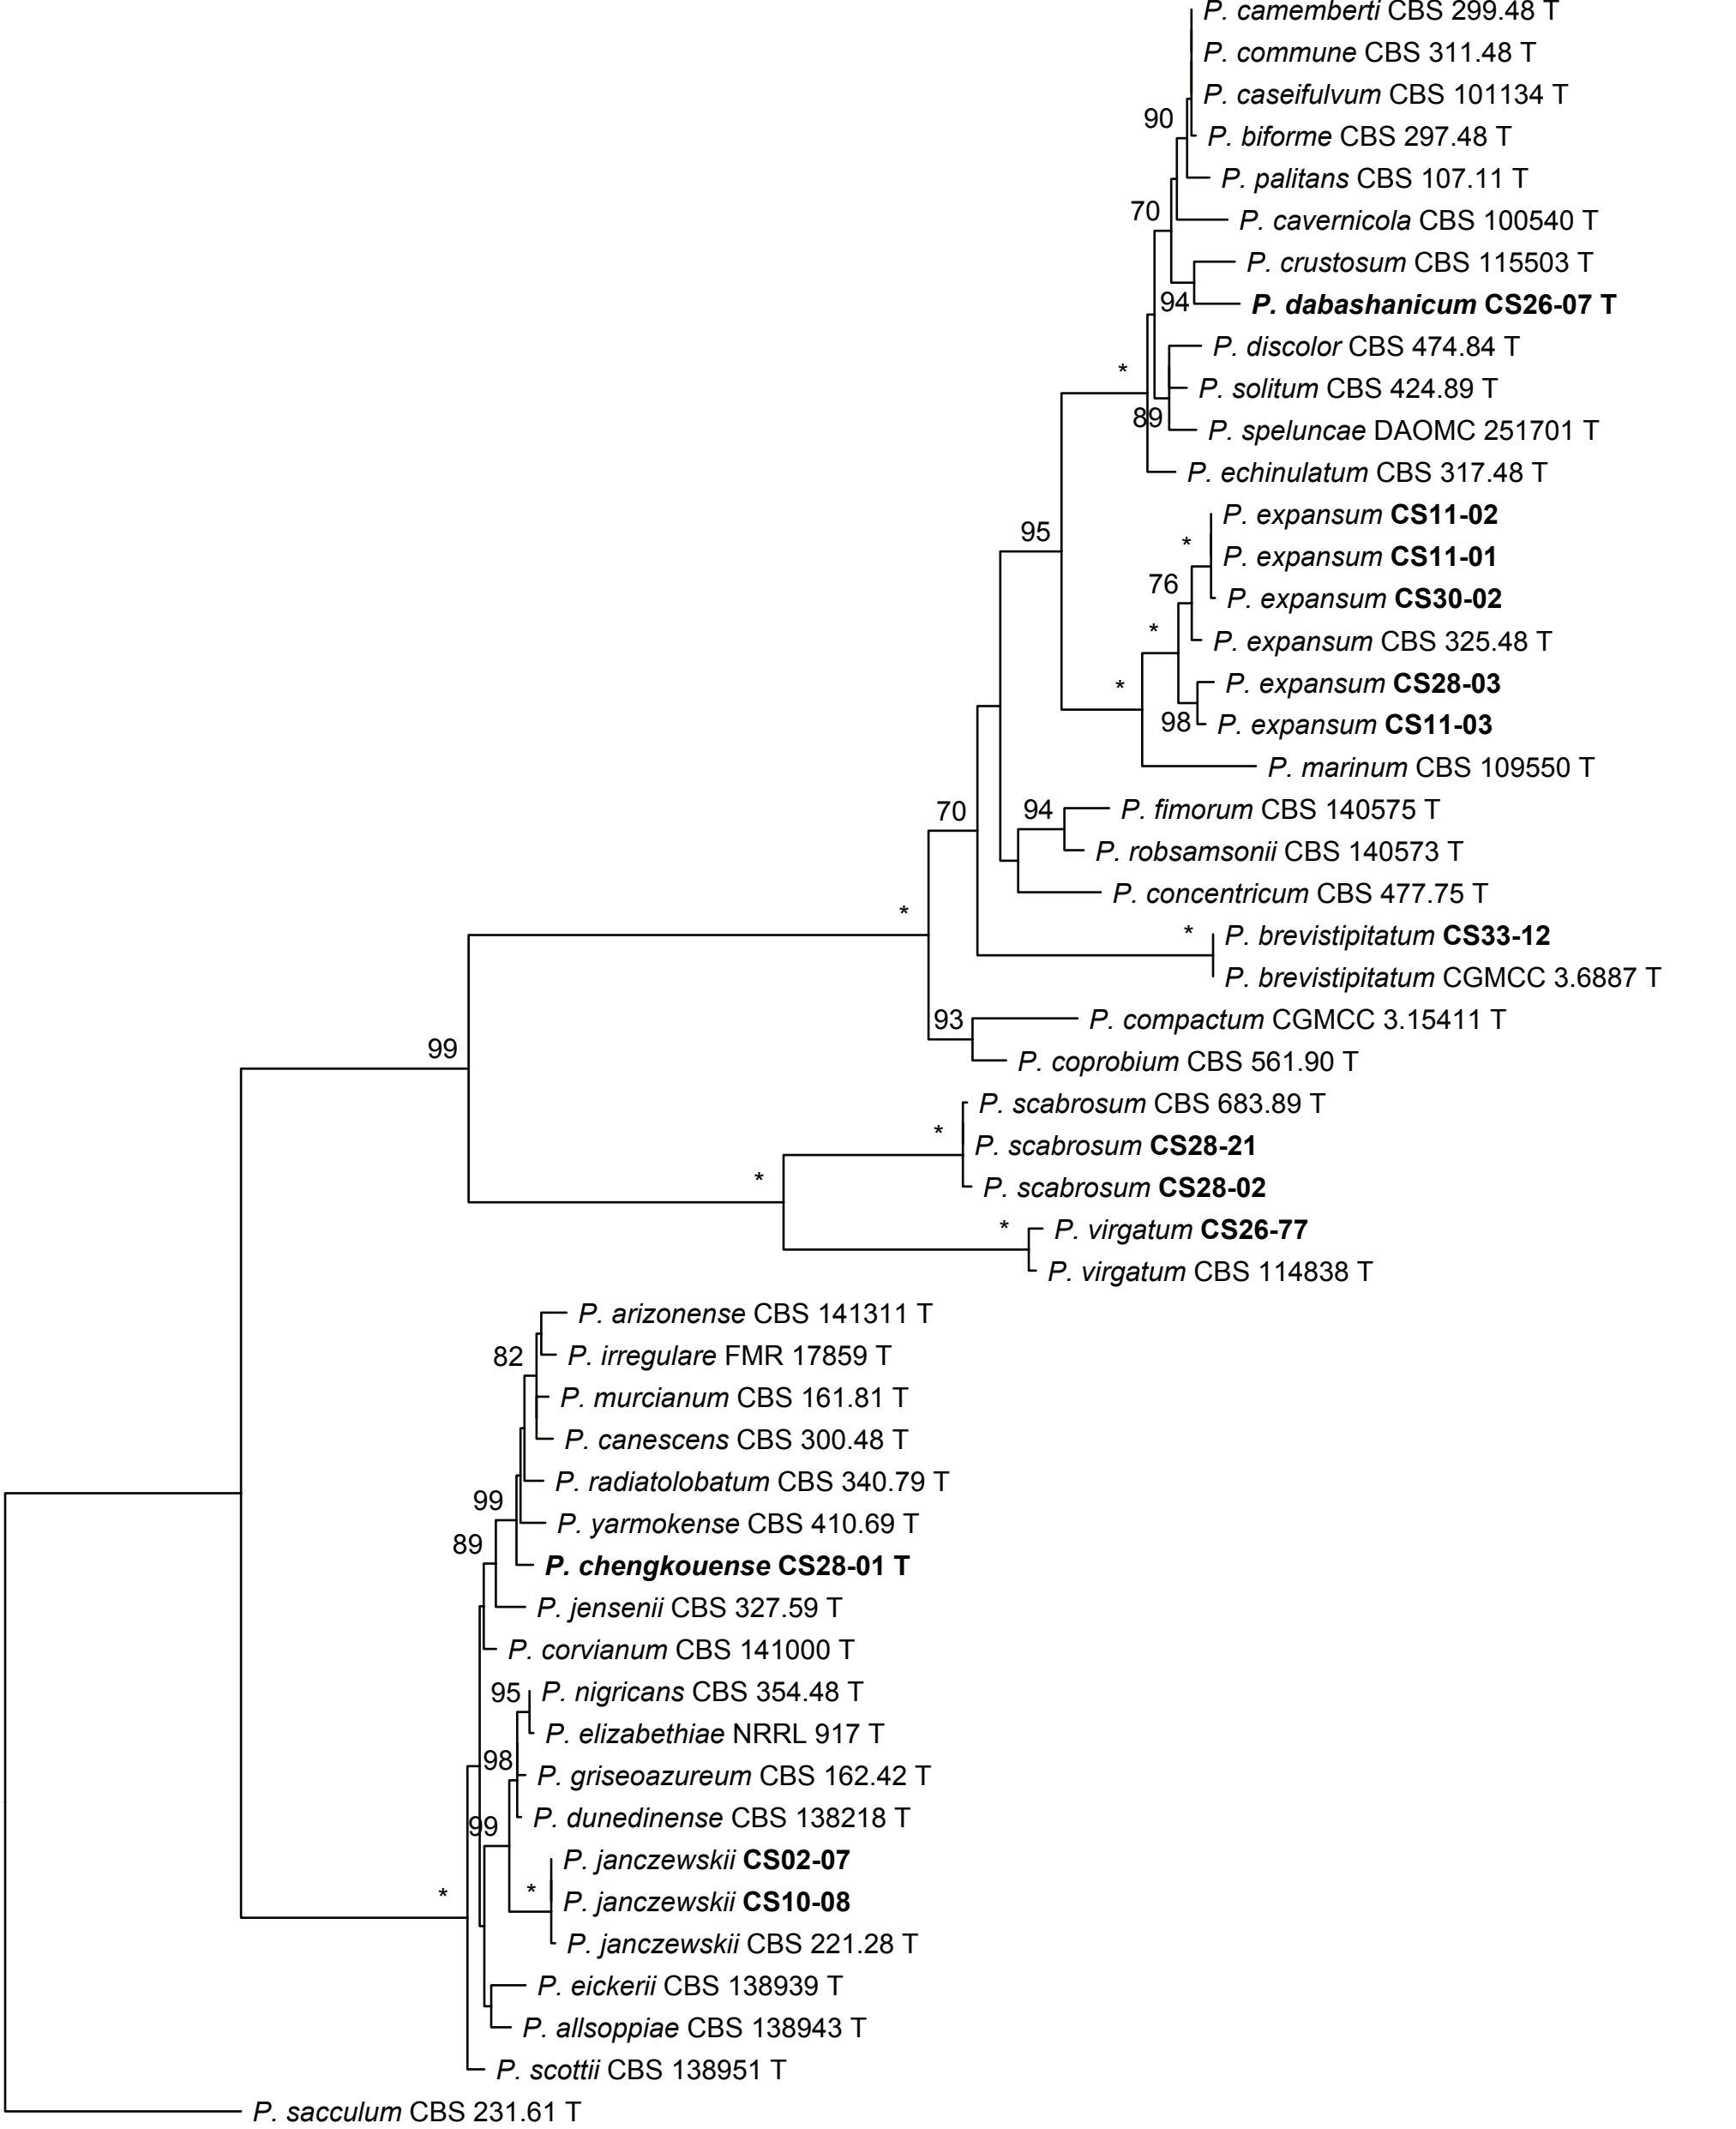

Supplement: s1 [file s1]

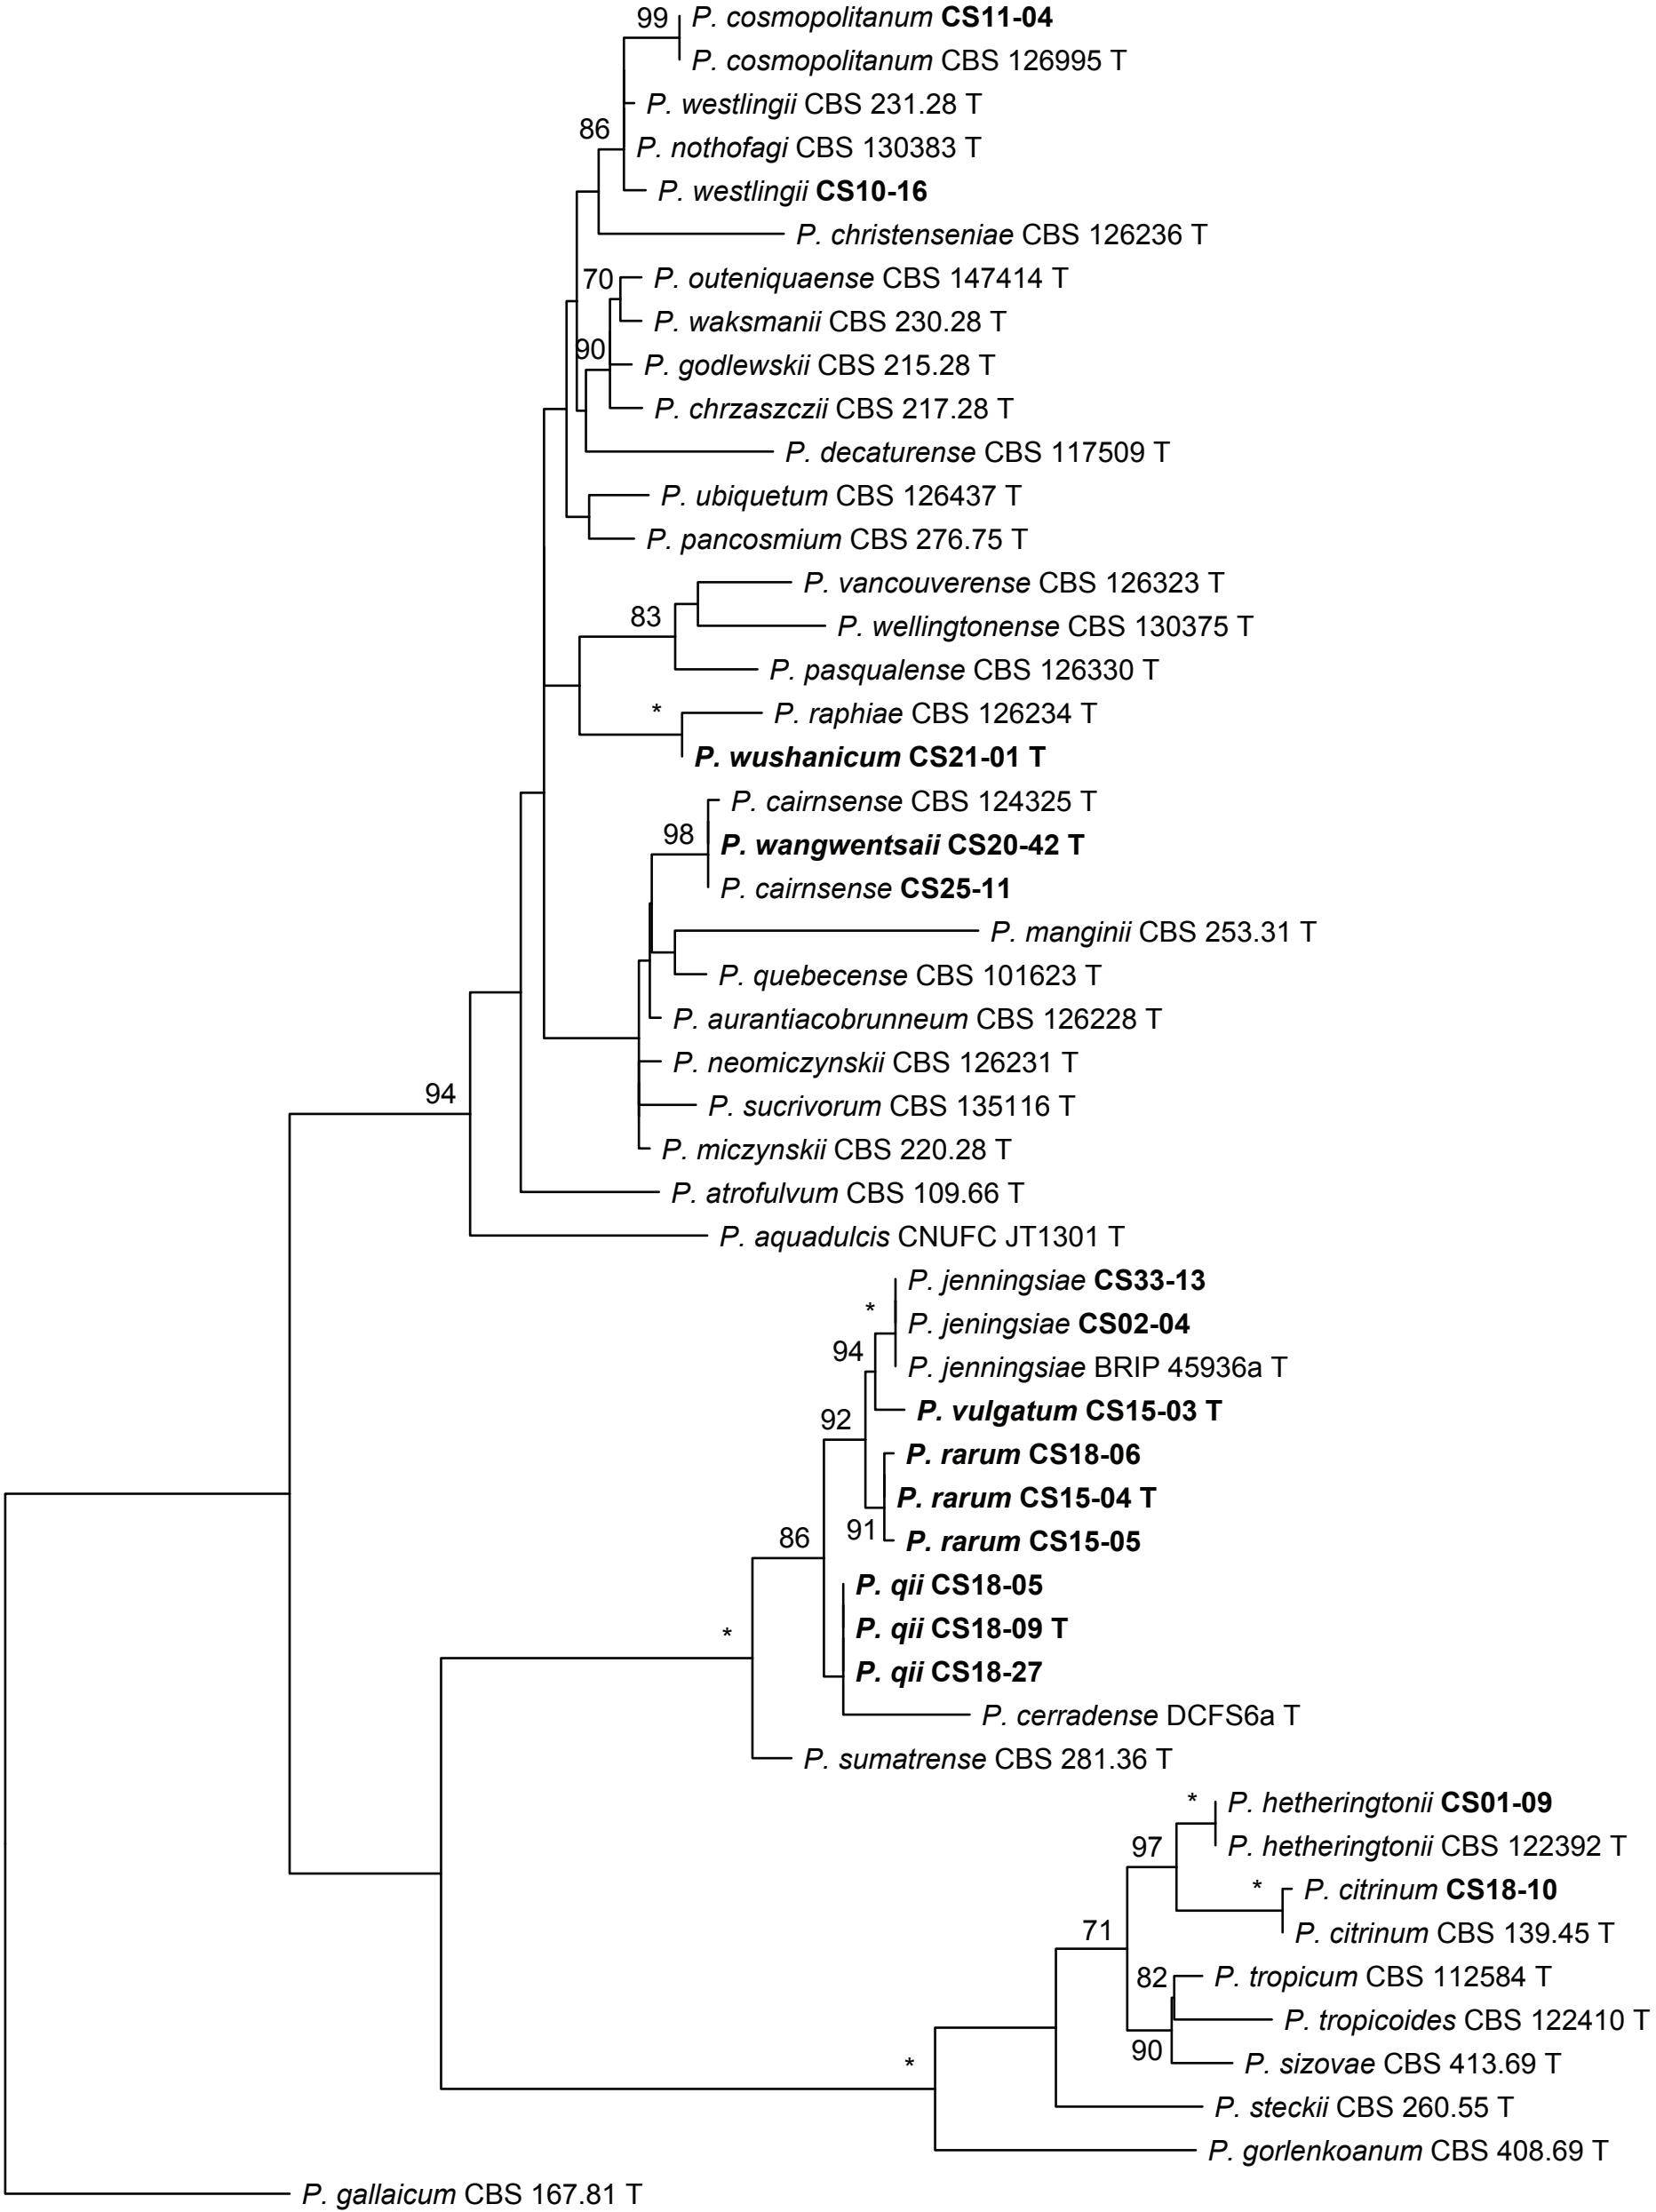

Supplement: s1 [file s1]

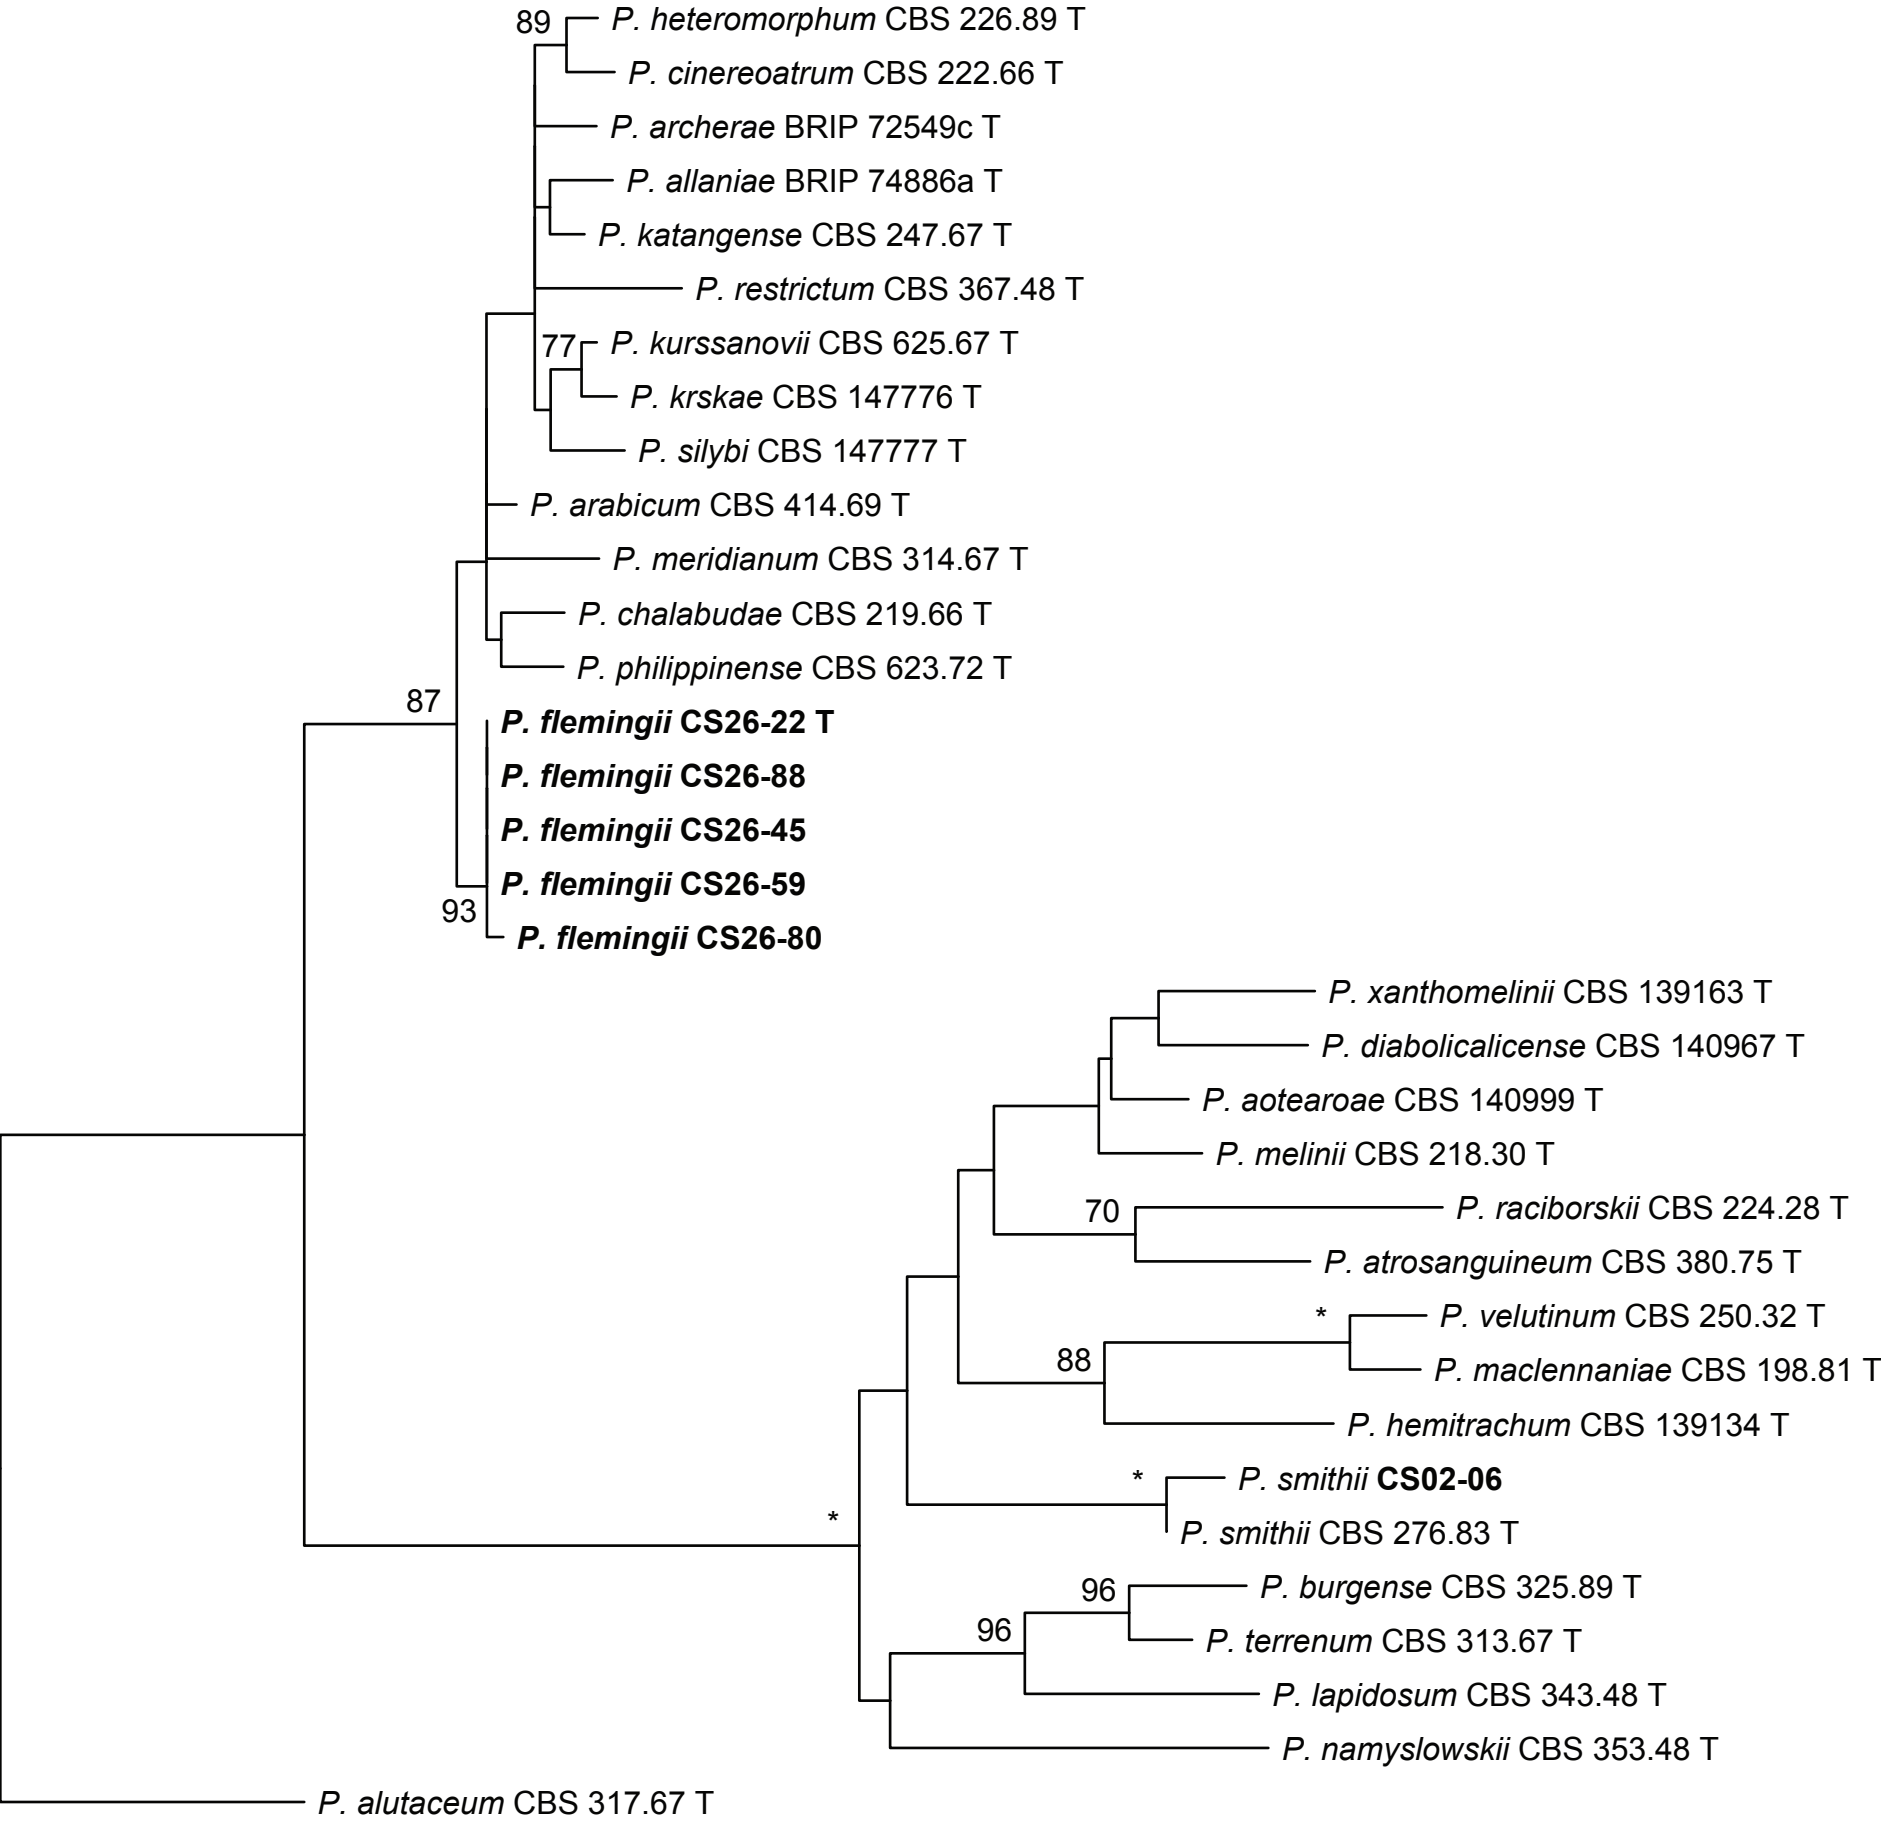

Supplement: s1 [file s1]

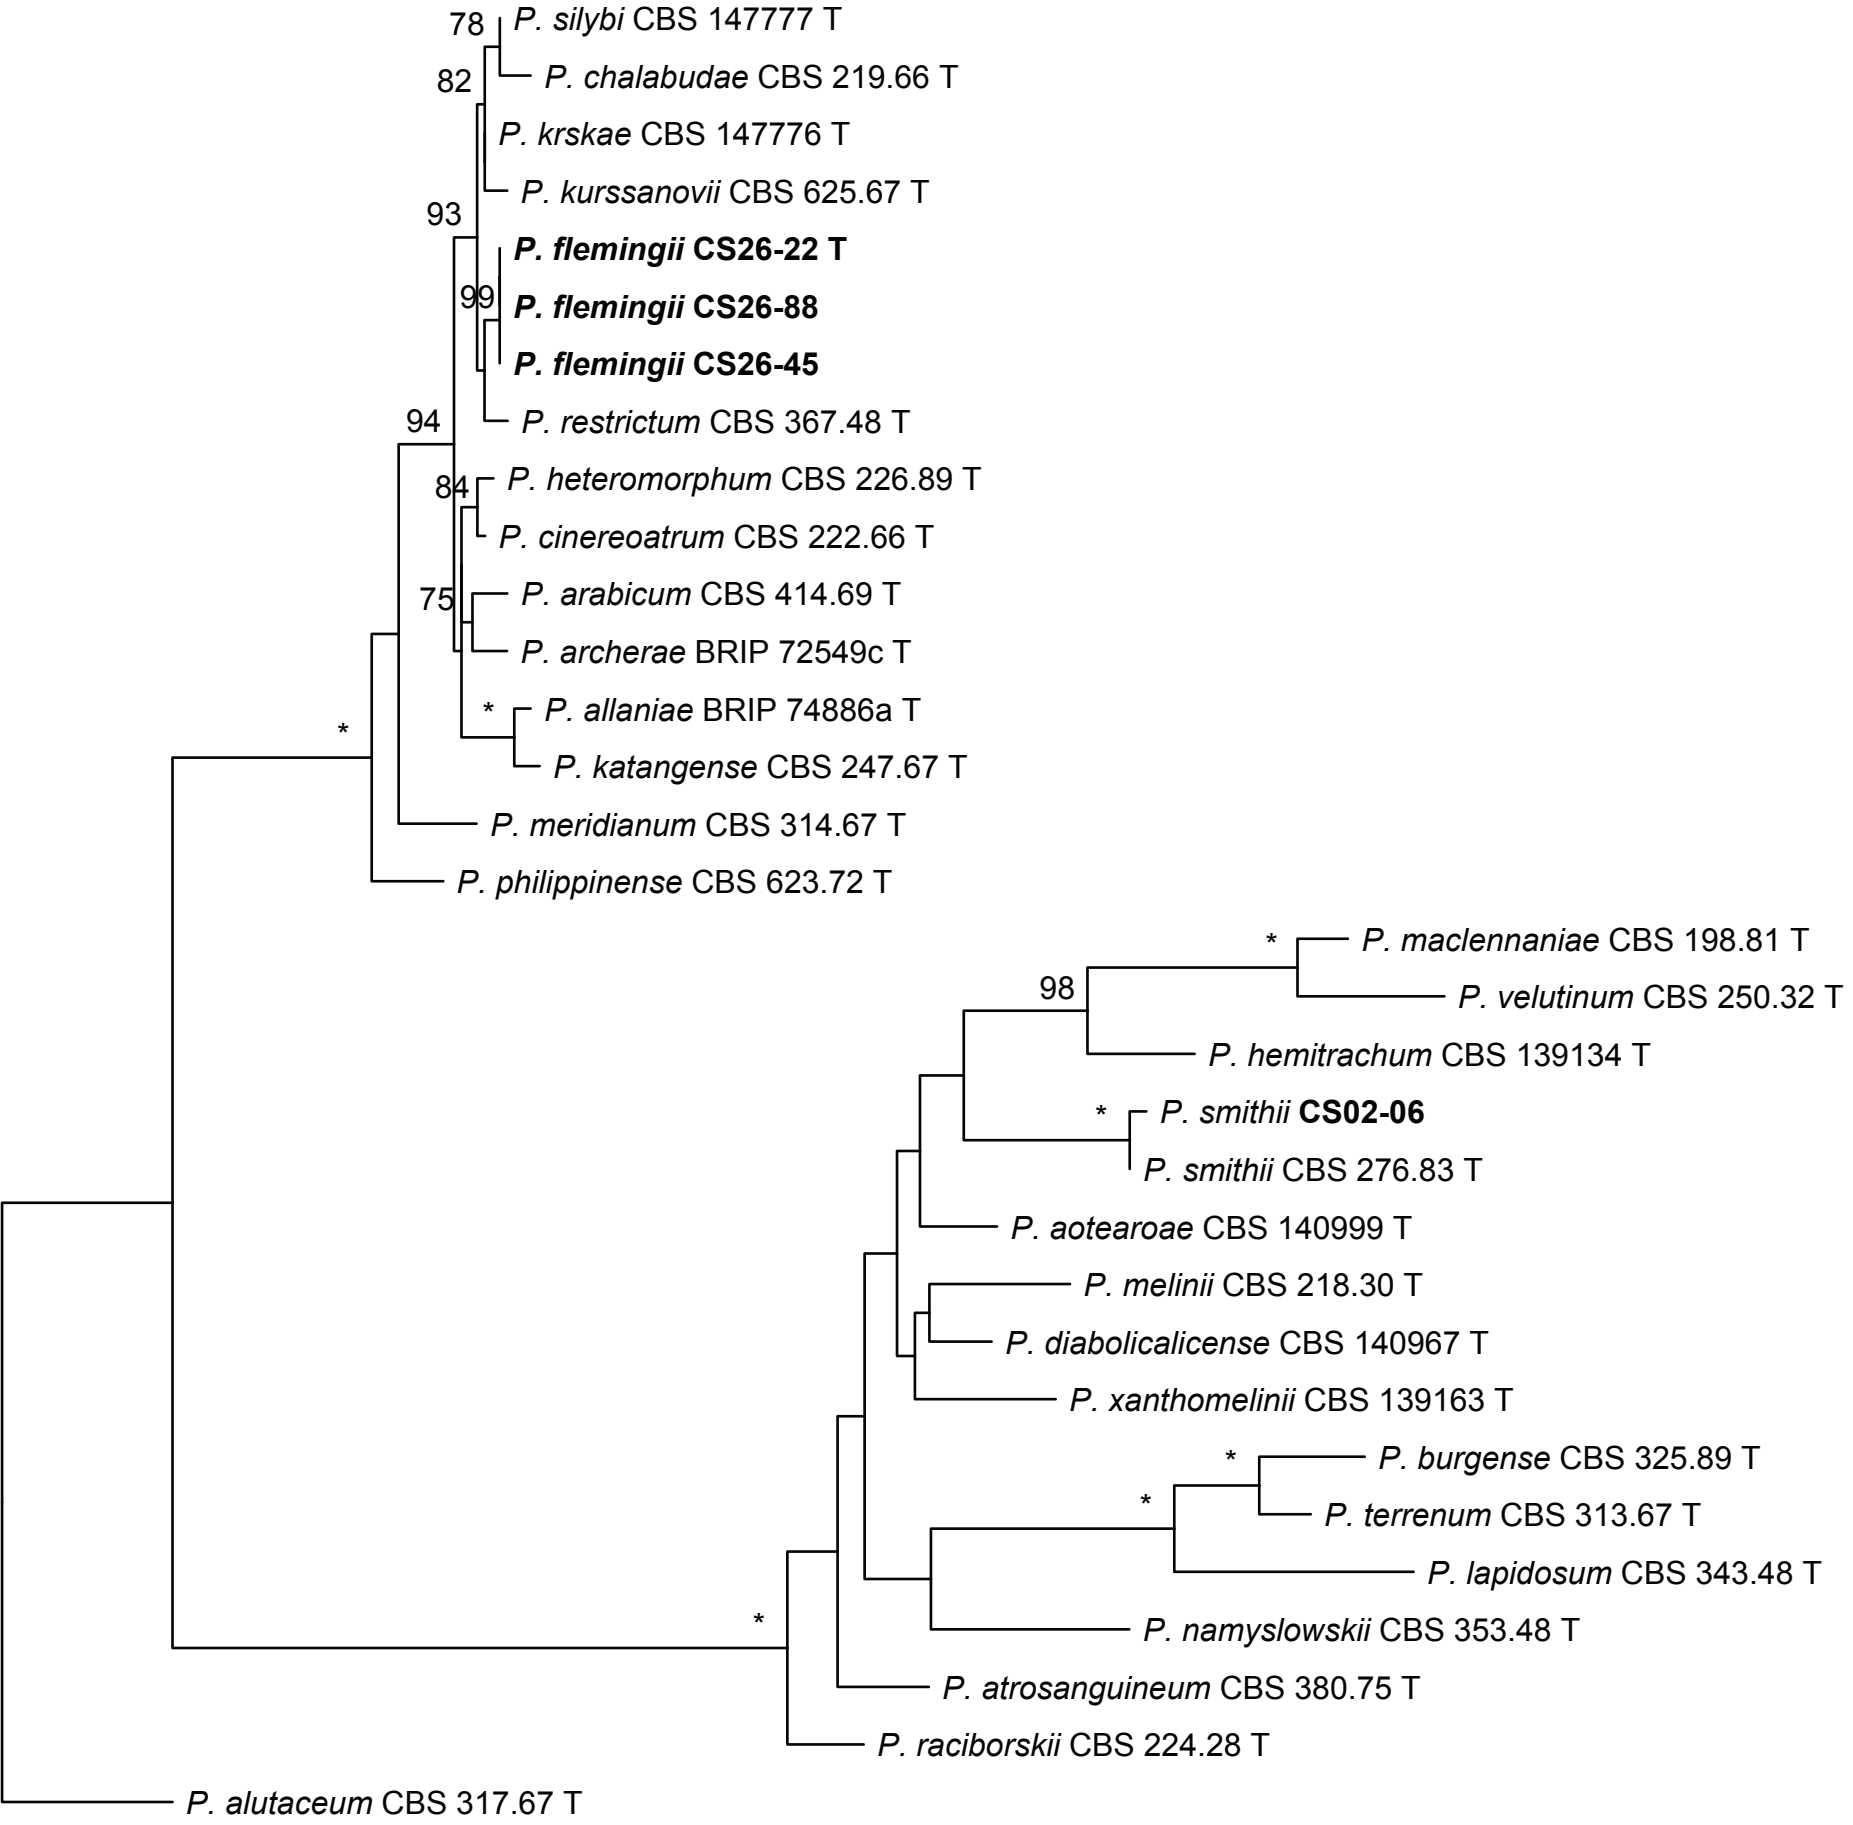

0.03

Supplement: s1 [file s1]

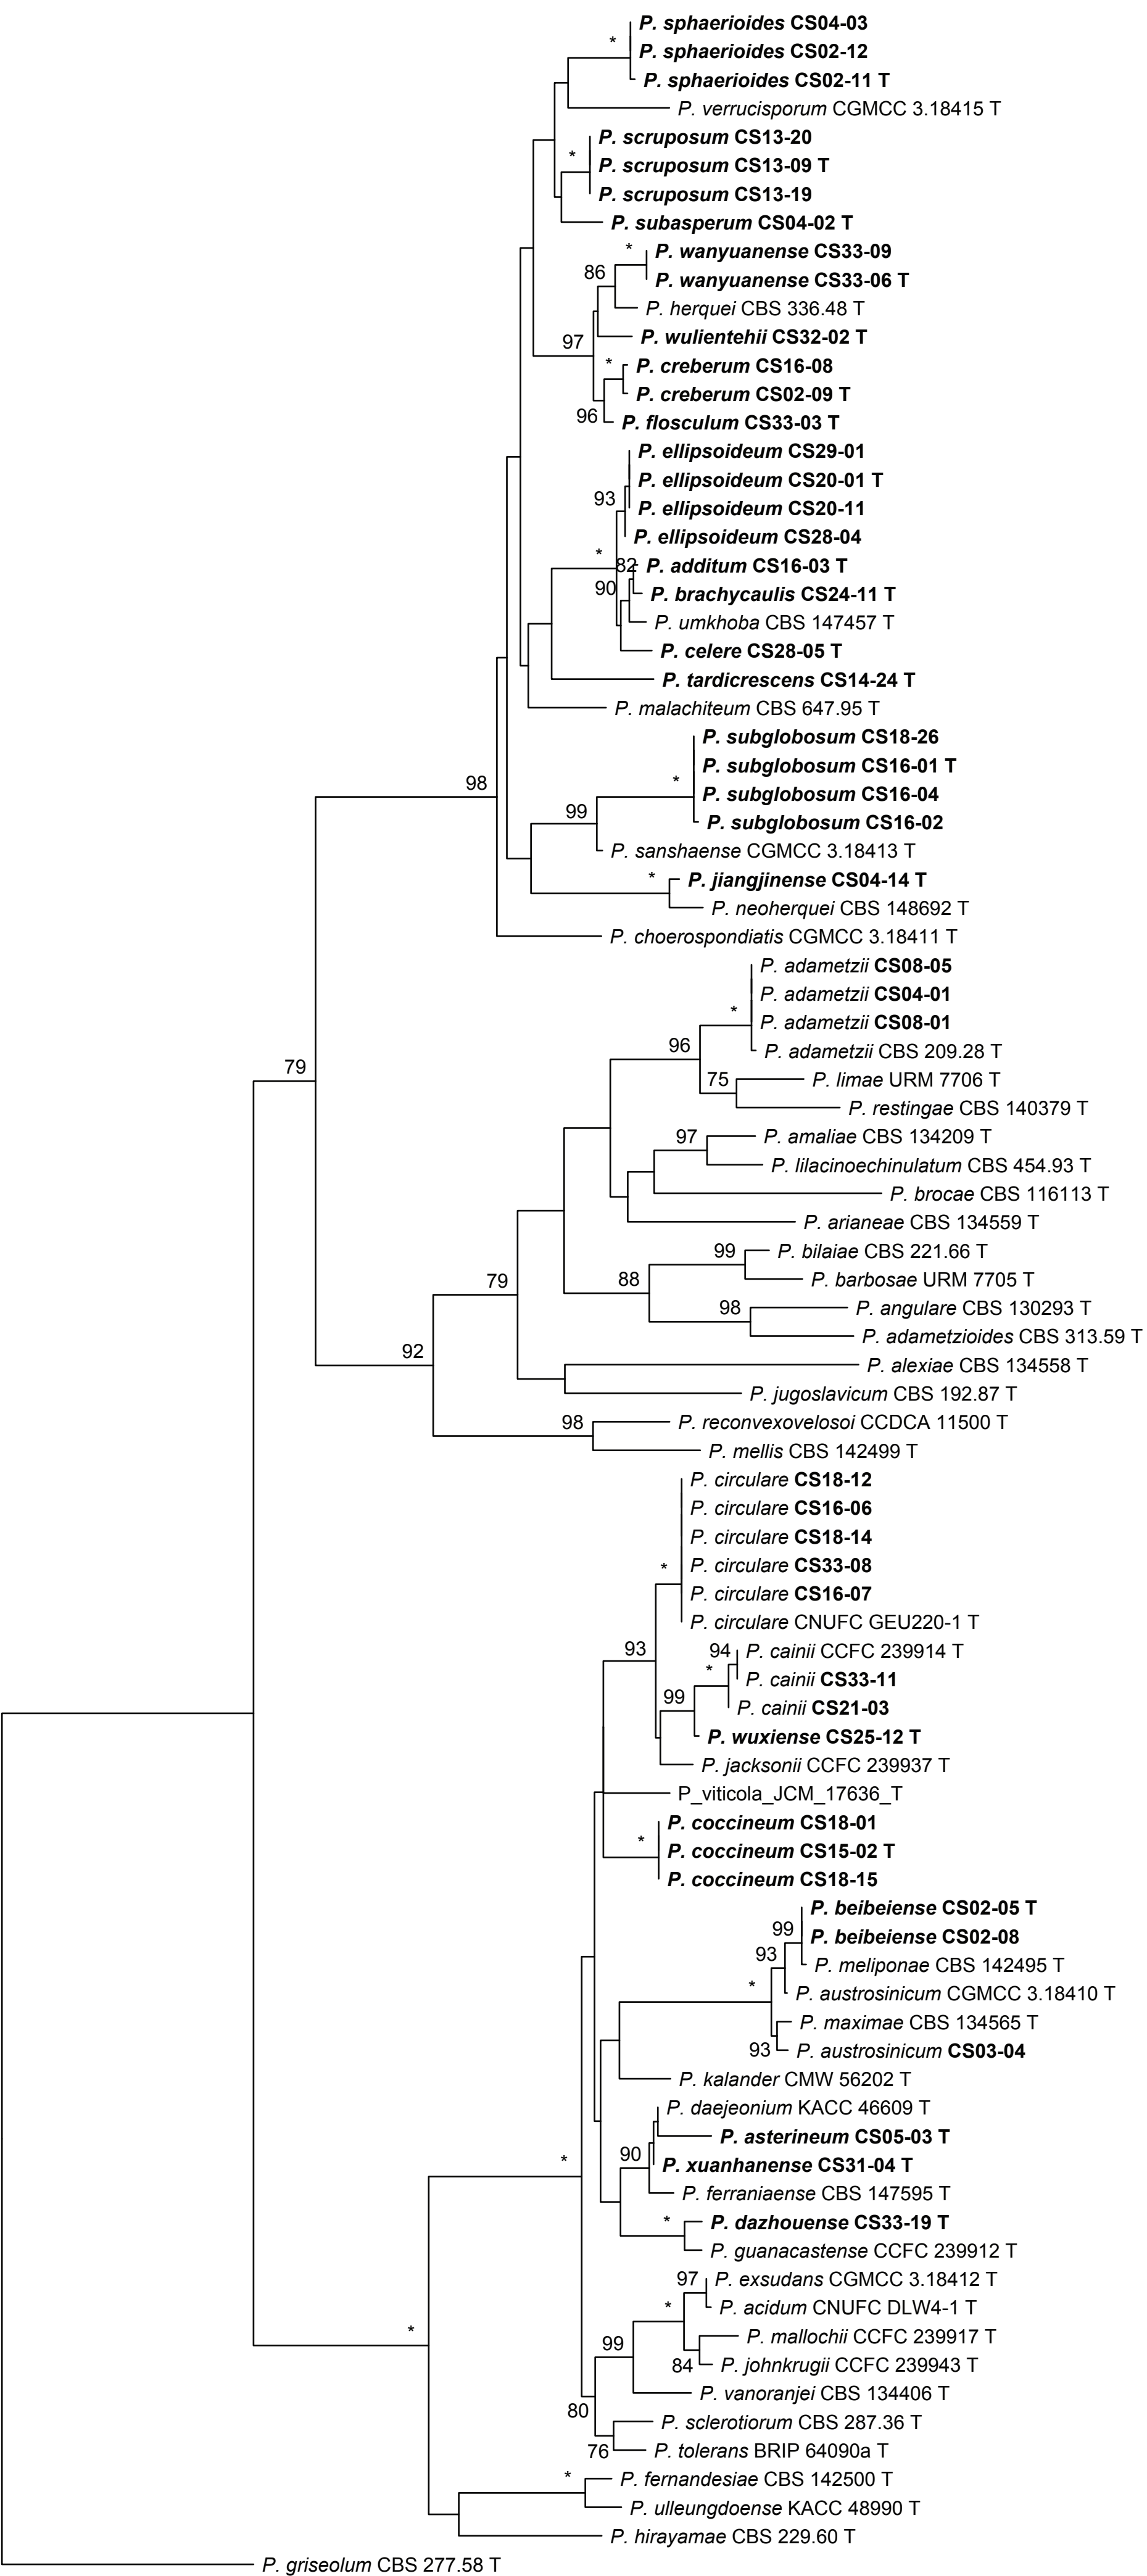

Supplement: s1 [file s1]

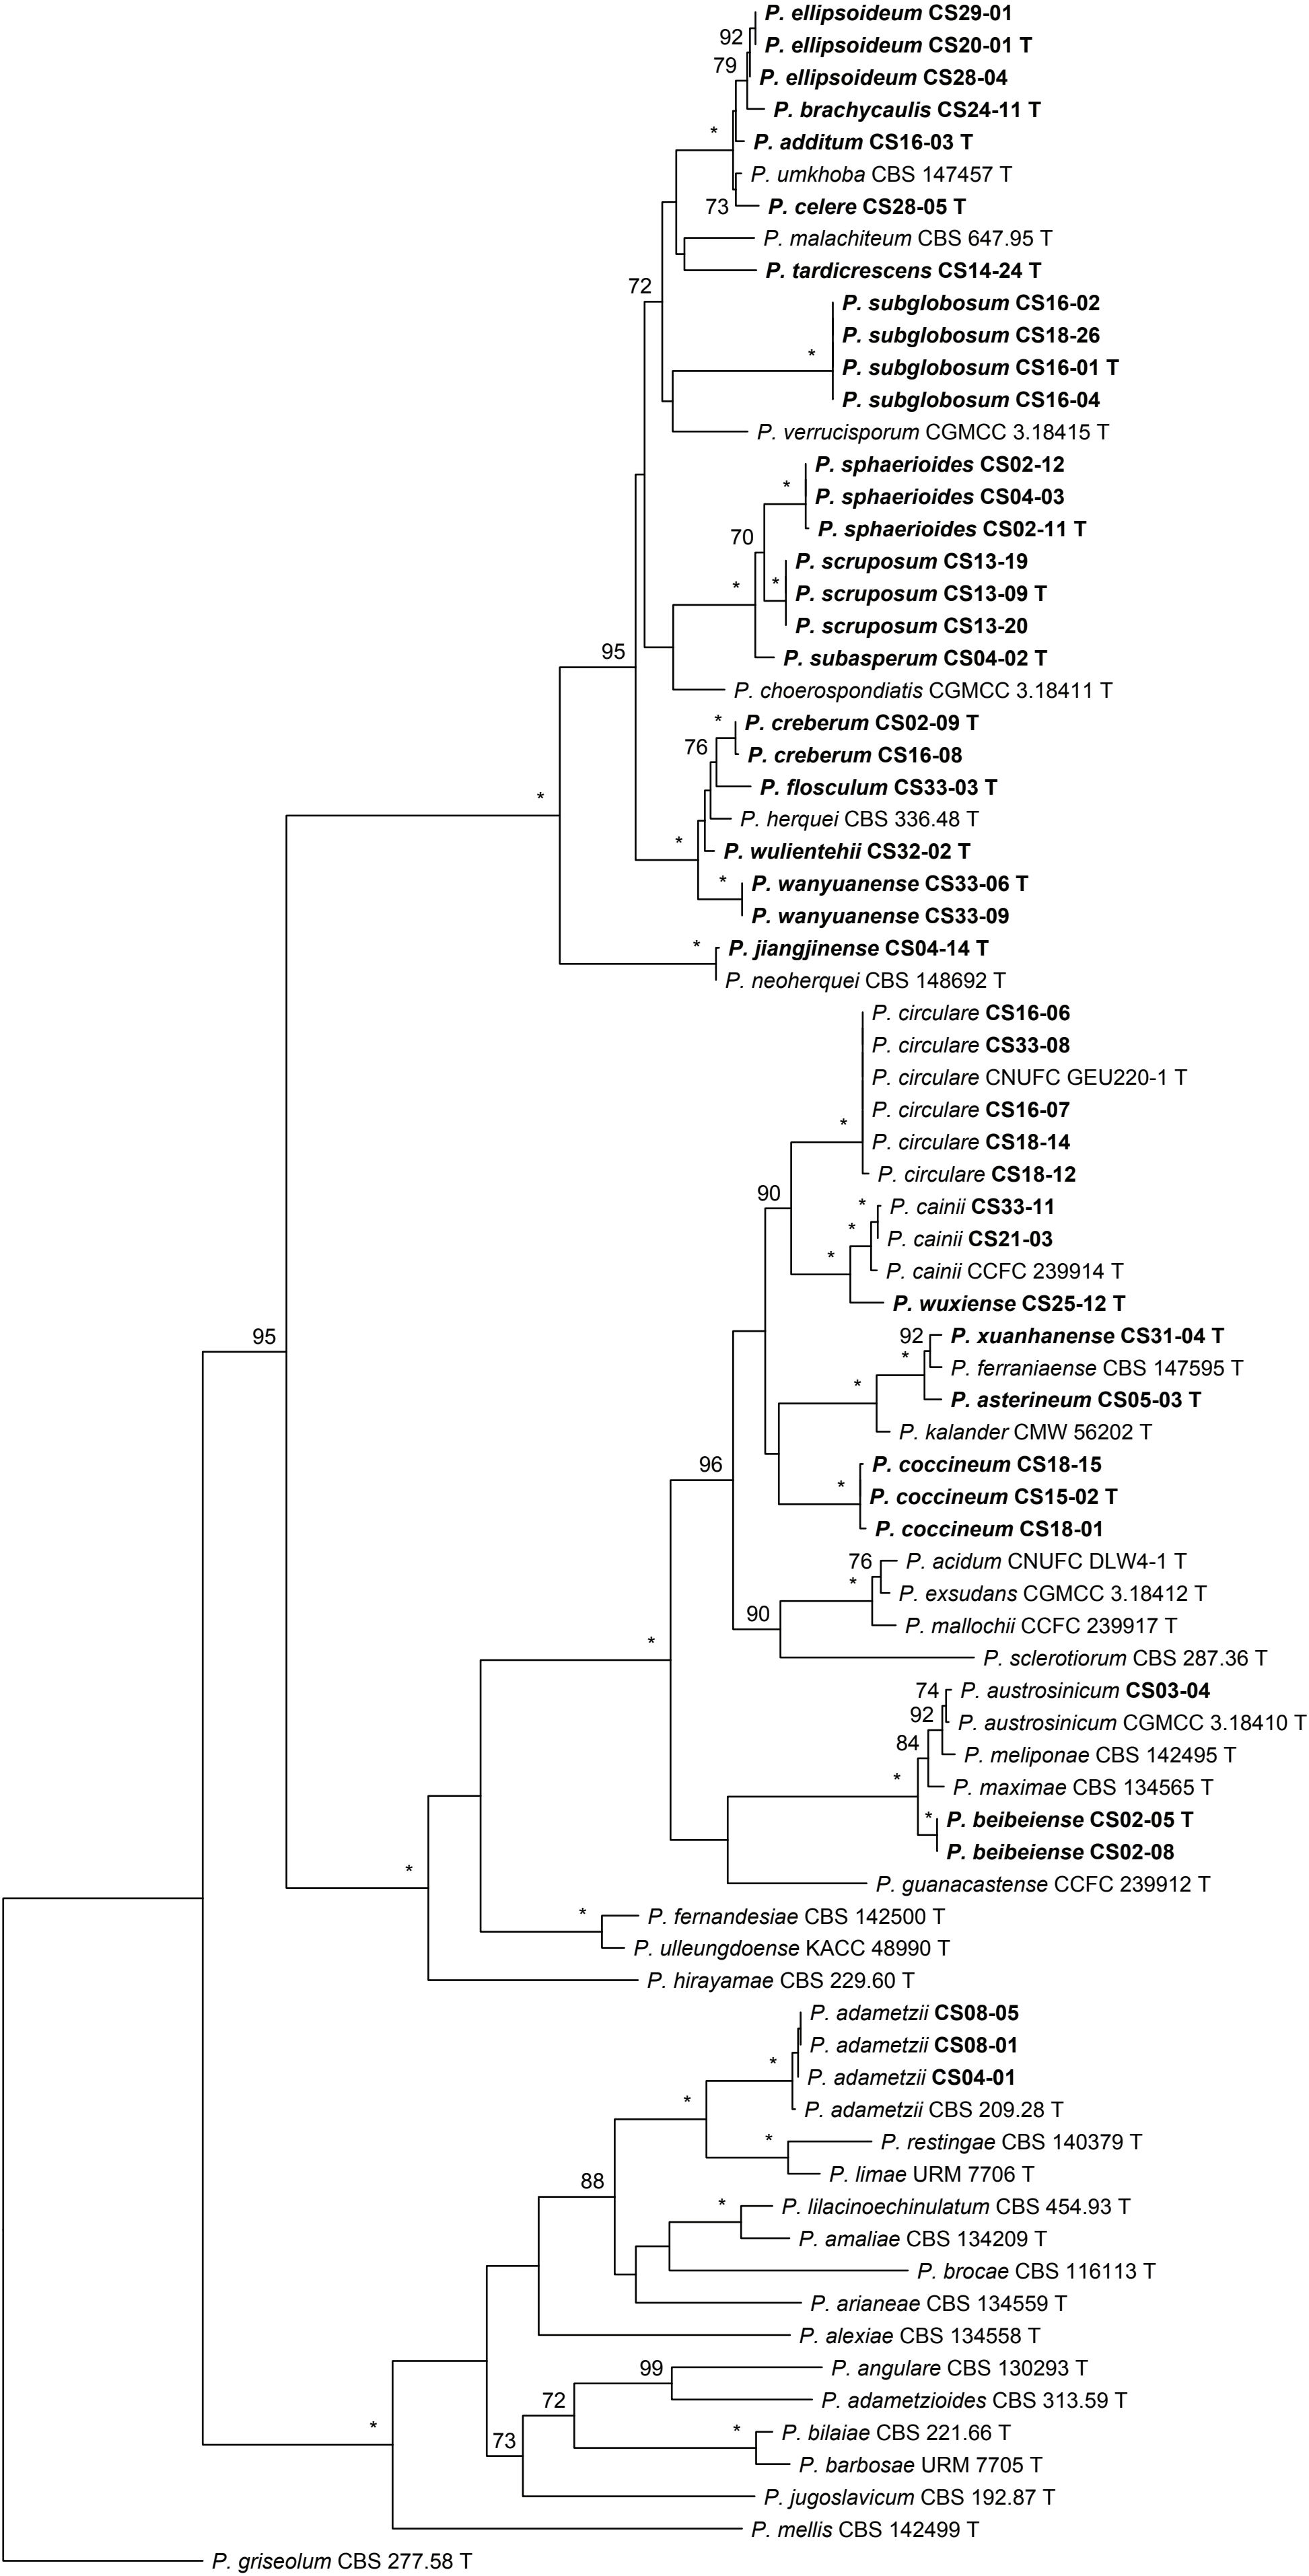

Supplement: s1 [file s1]

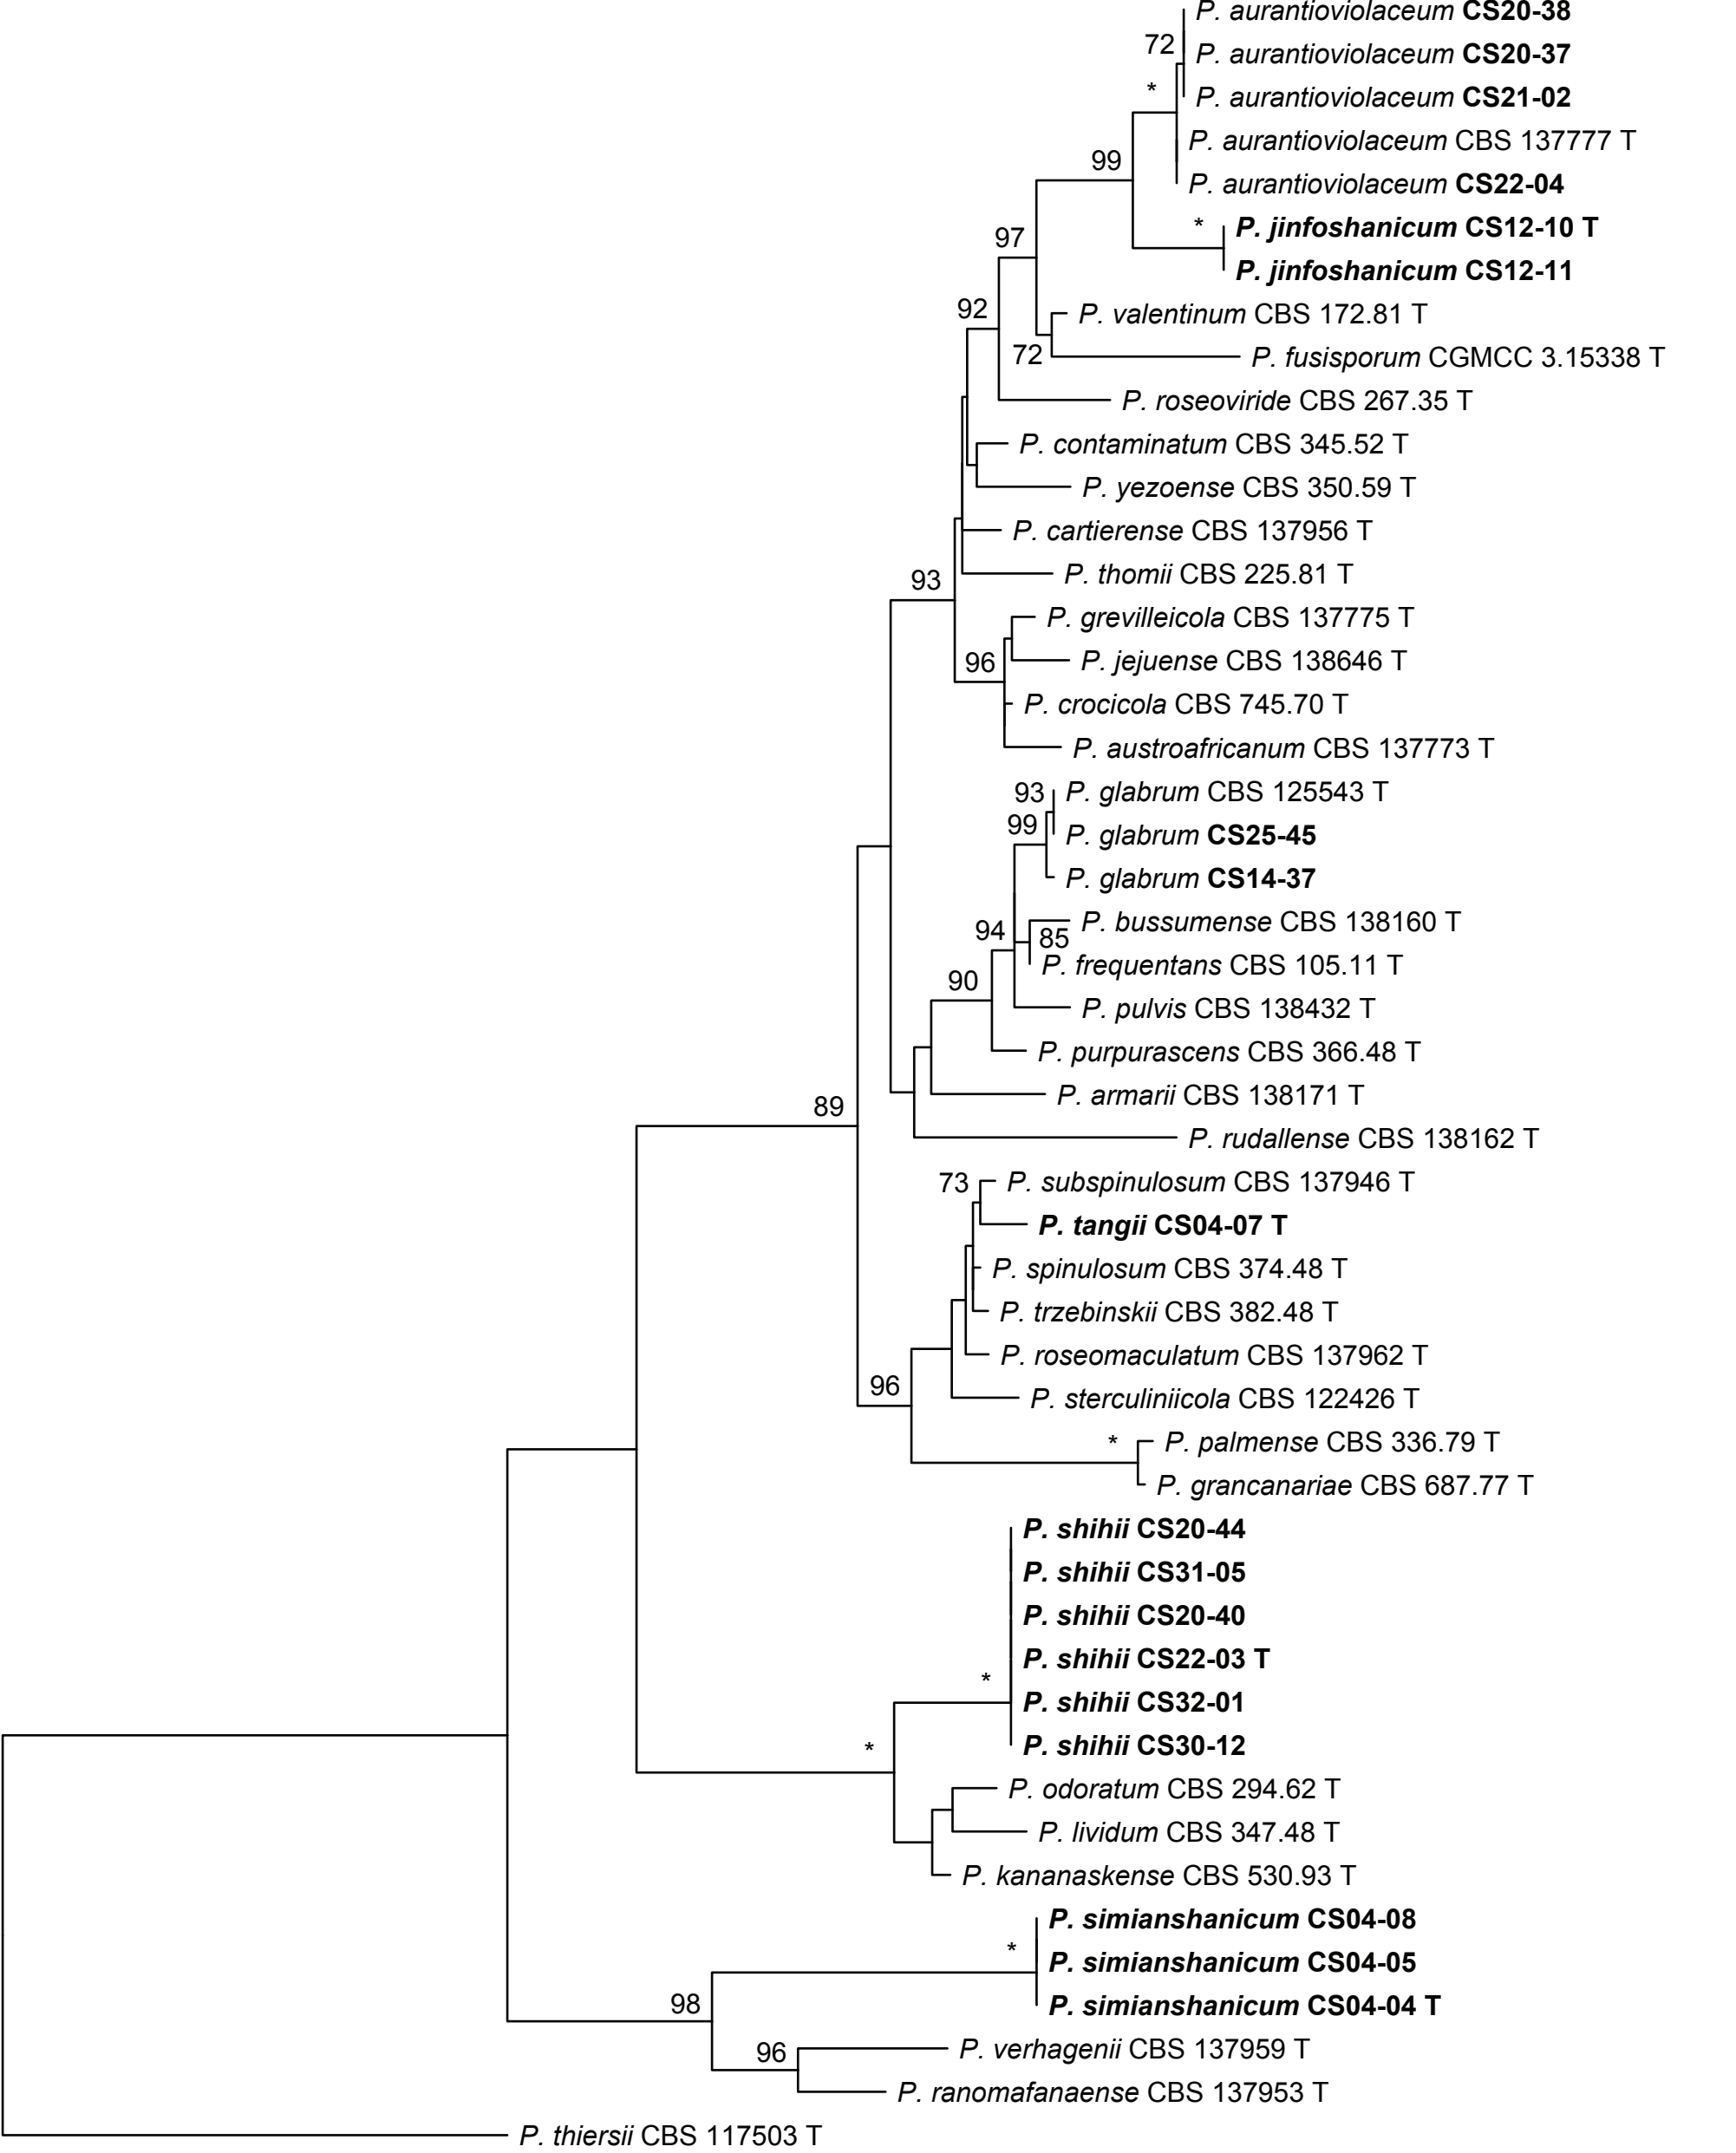

Supplement: s1 [file s1]

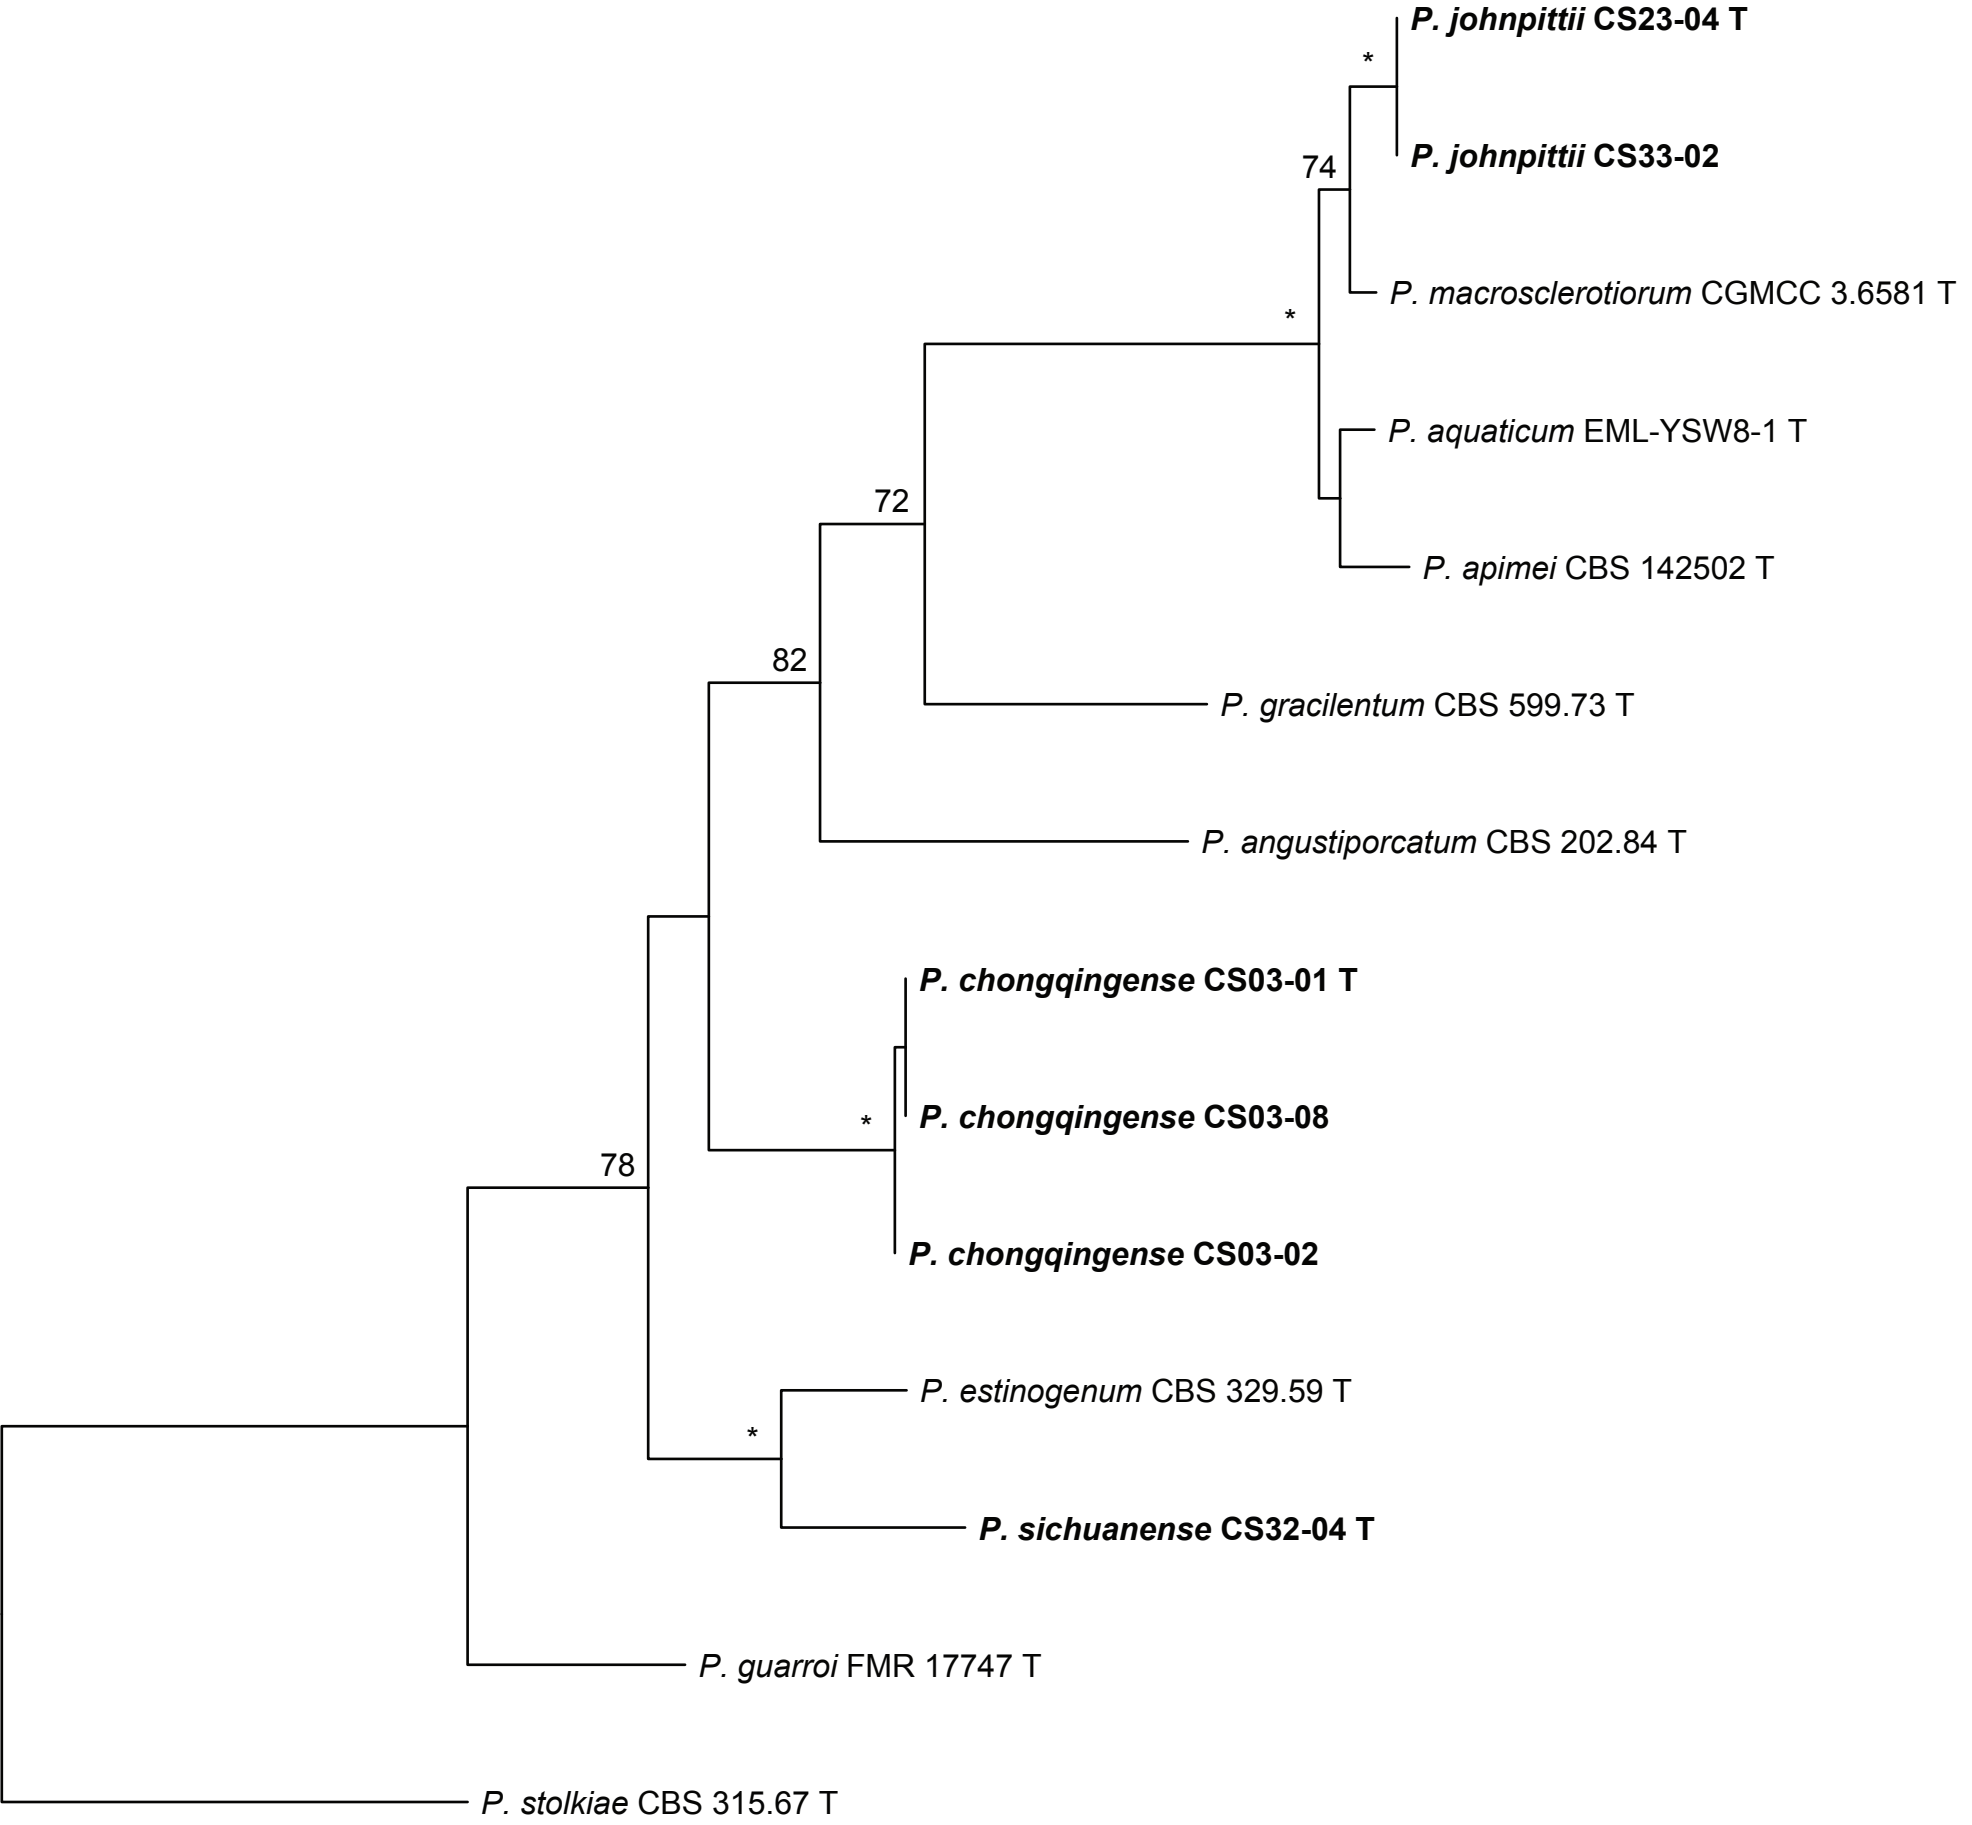

0.09

Supplement: s1 [file s1]

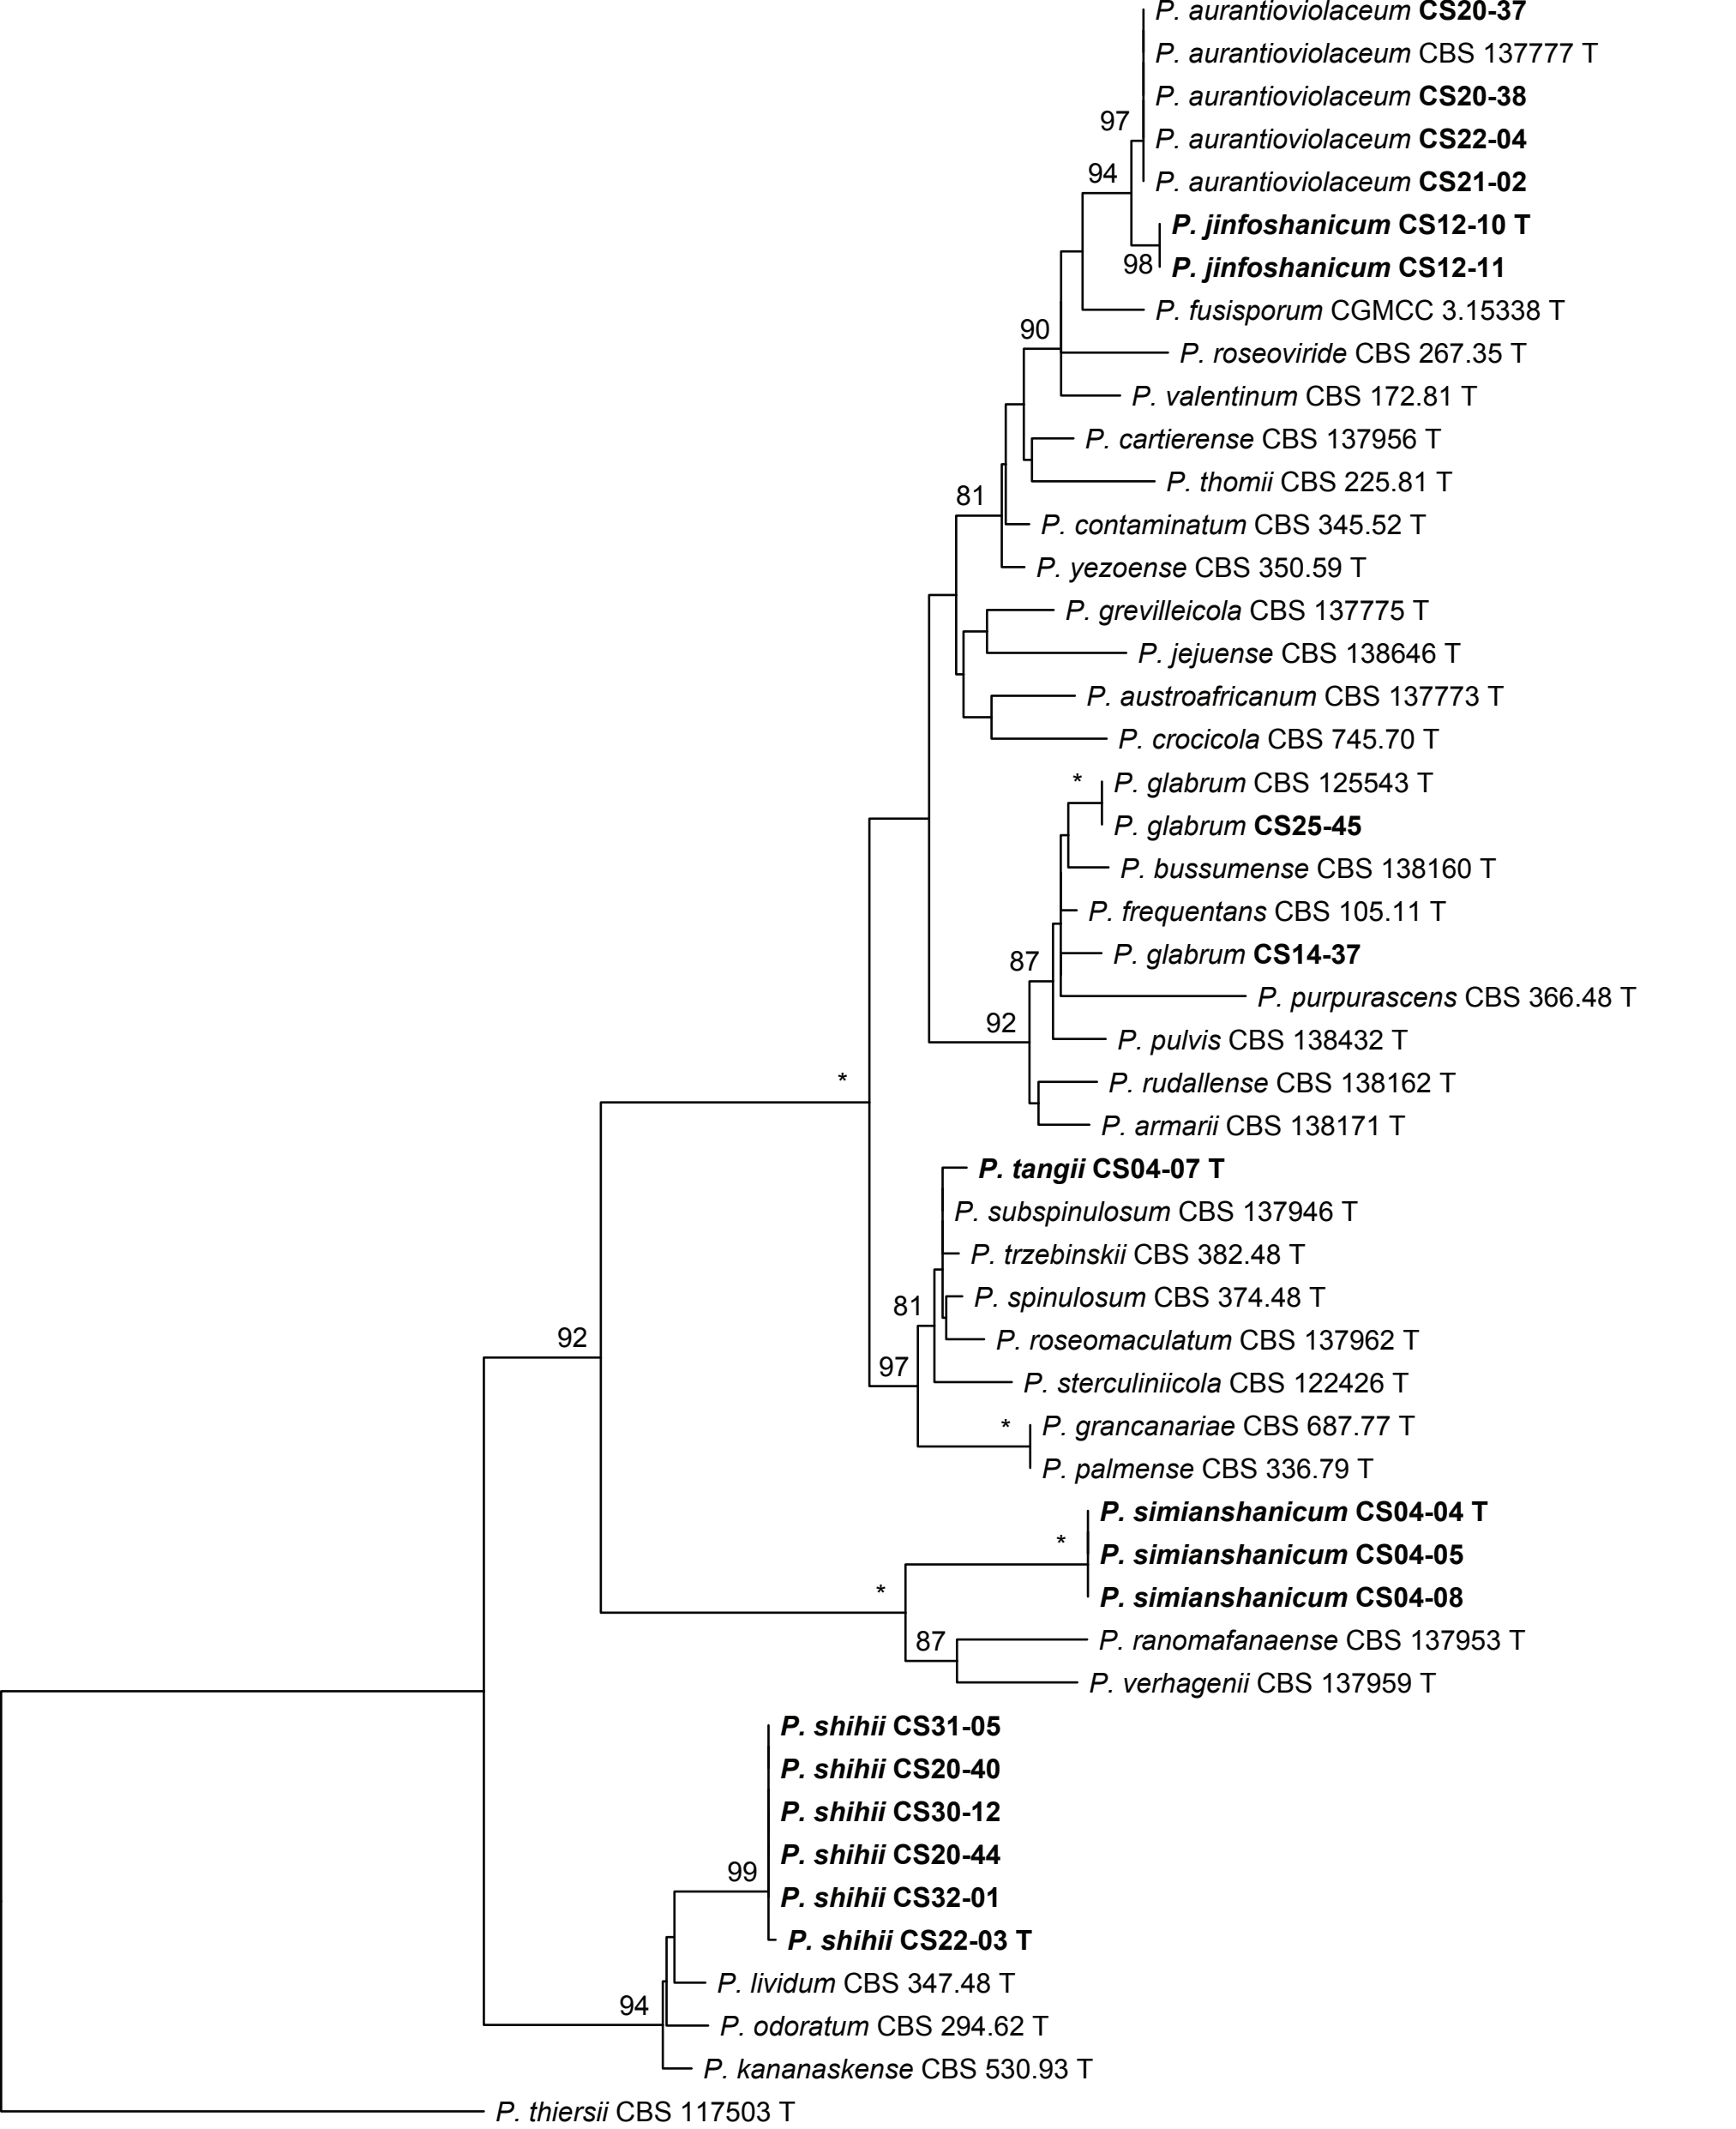

Supplement: s1 [file s1]

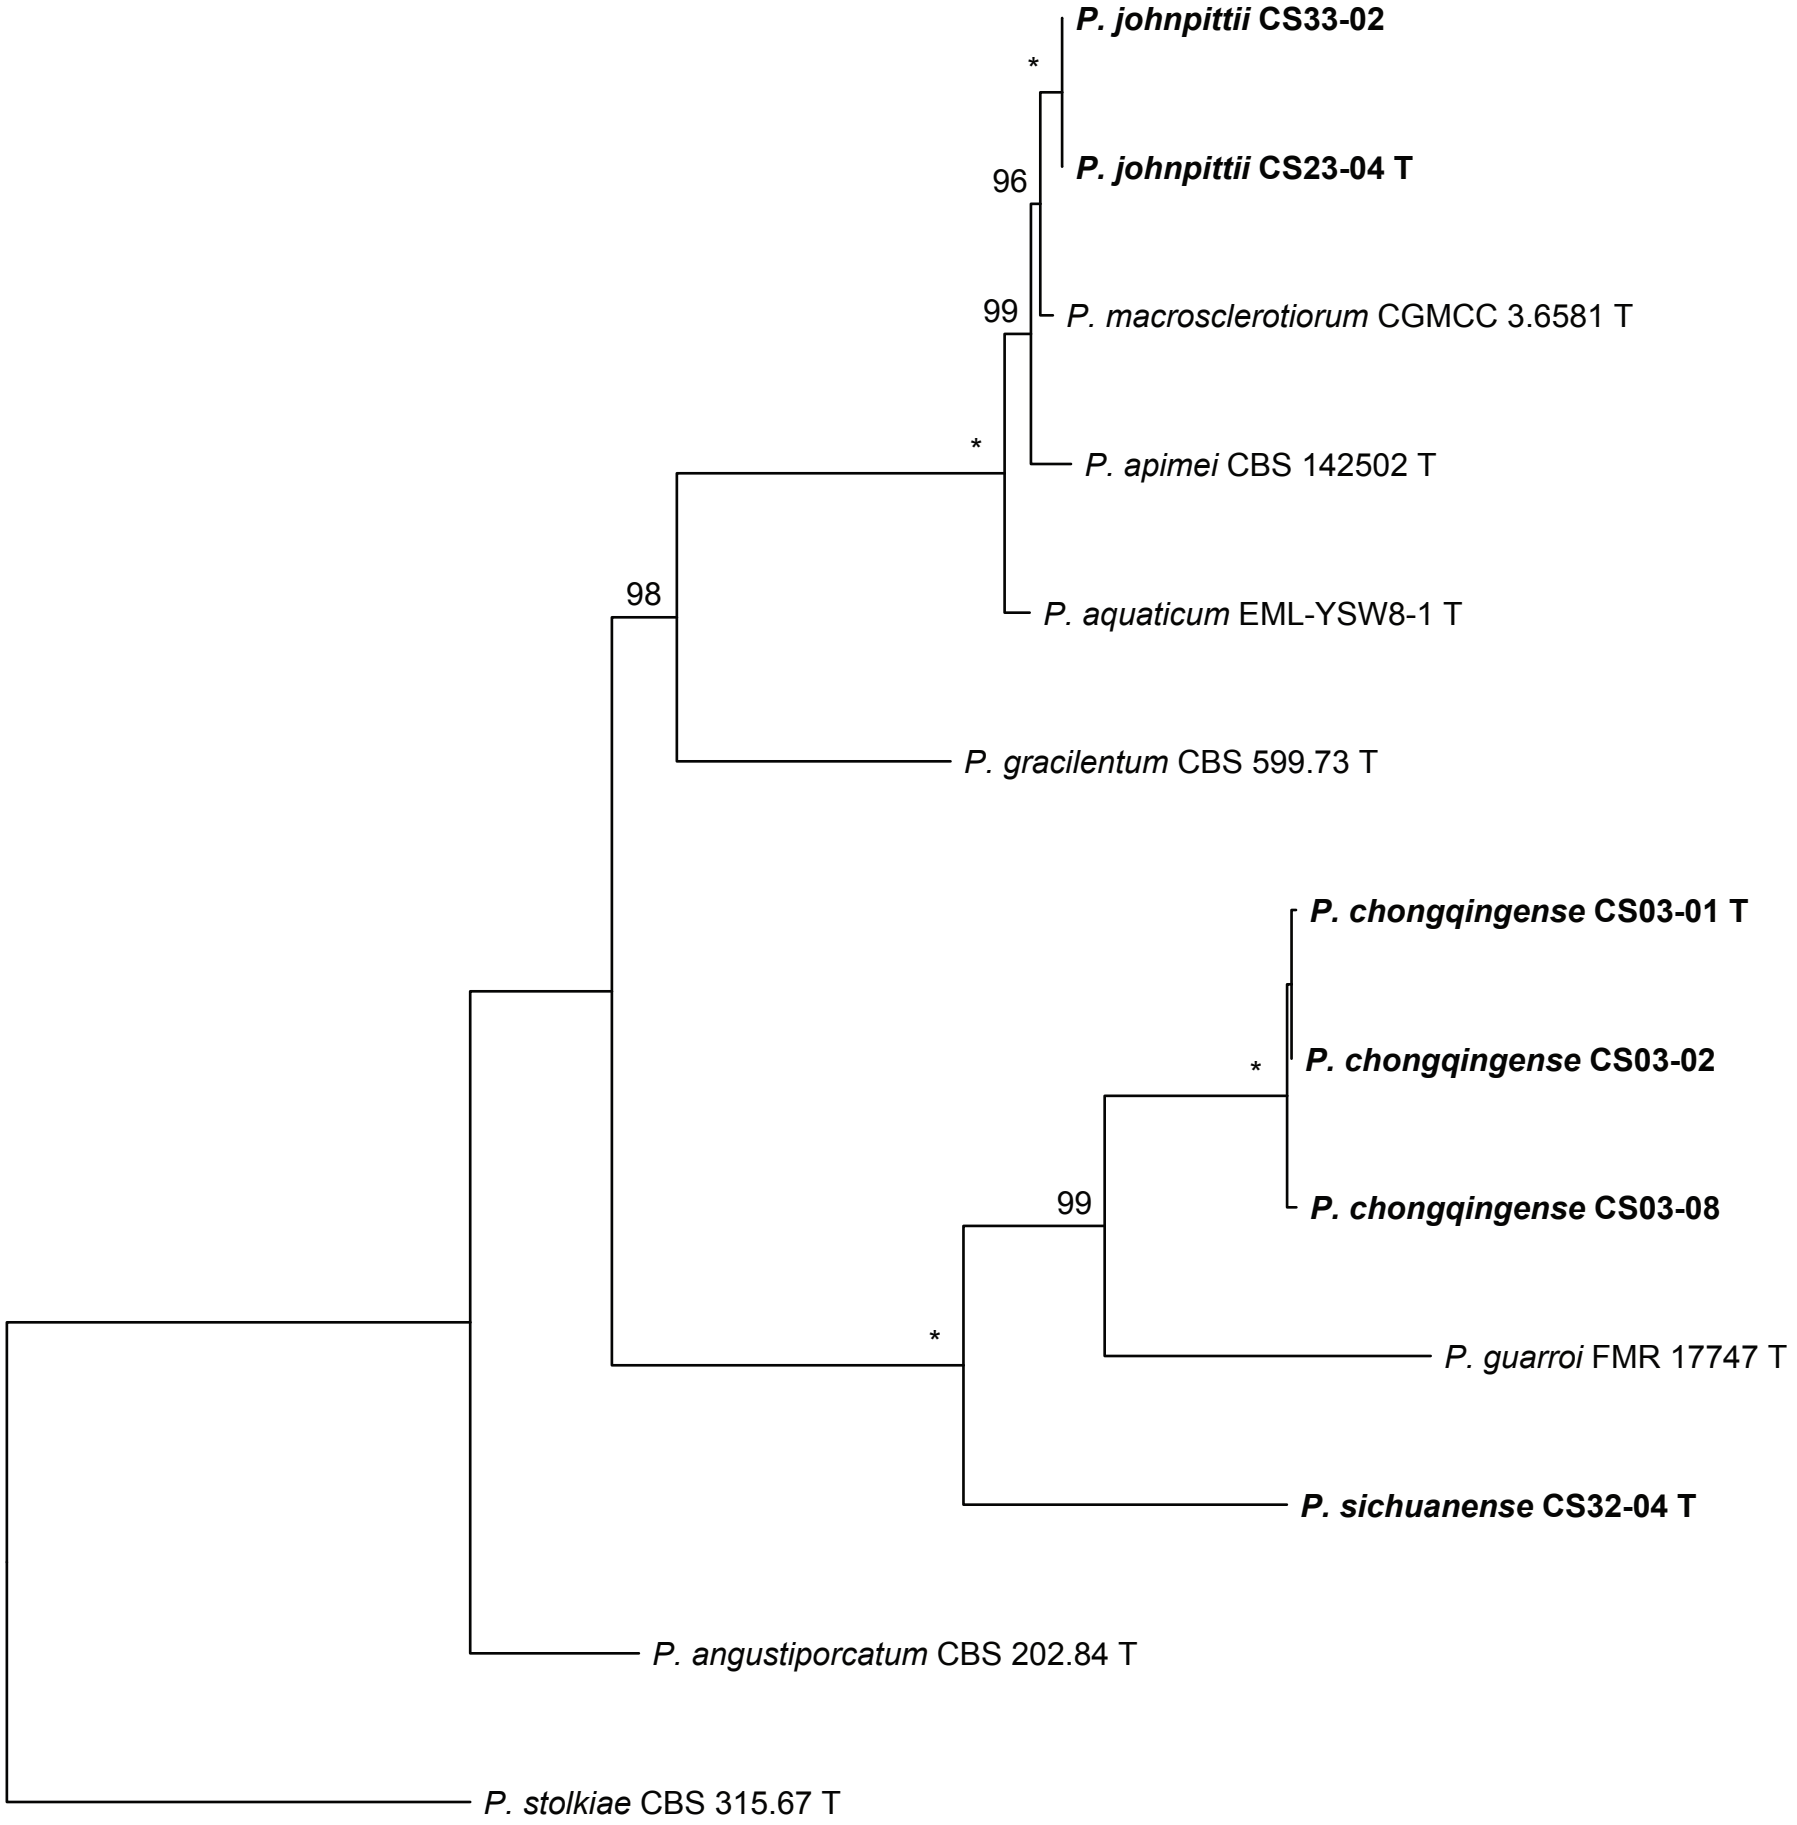

0.06

Supplement: s1 [file s1]

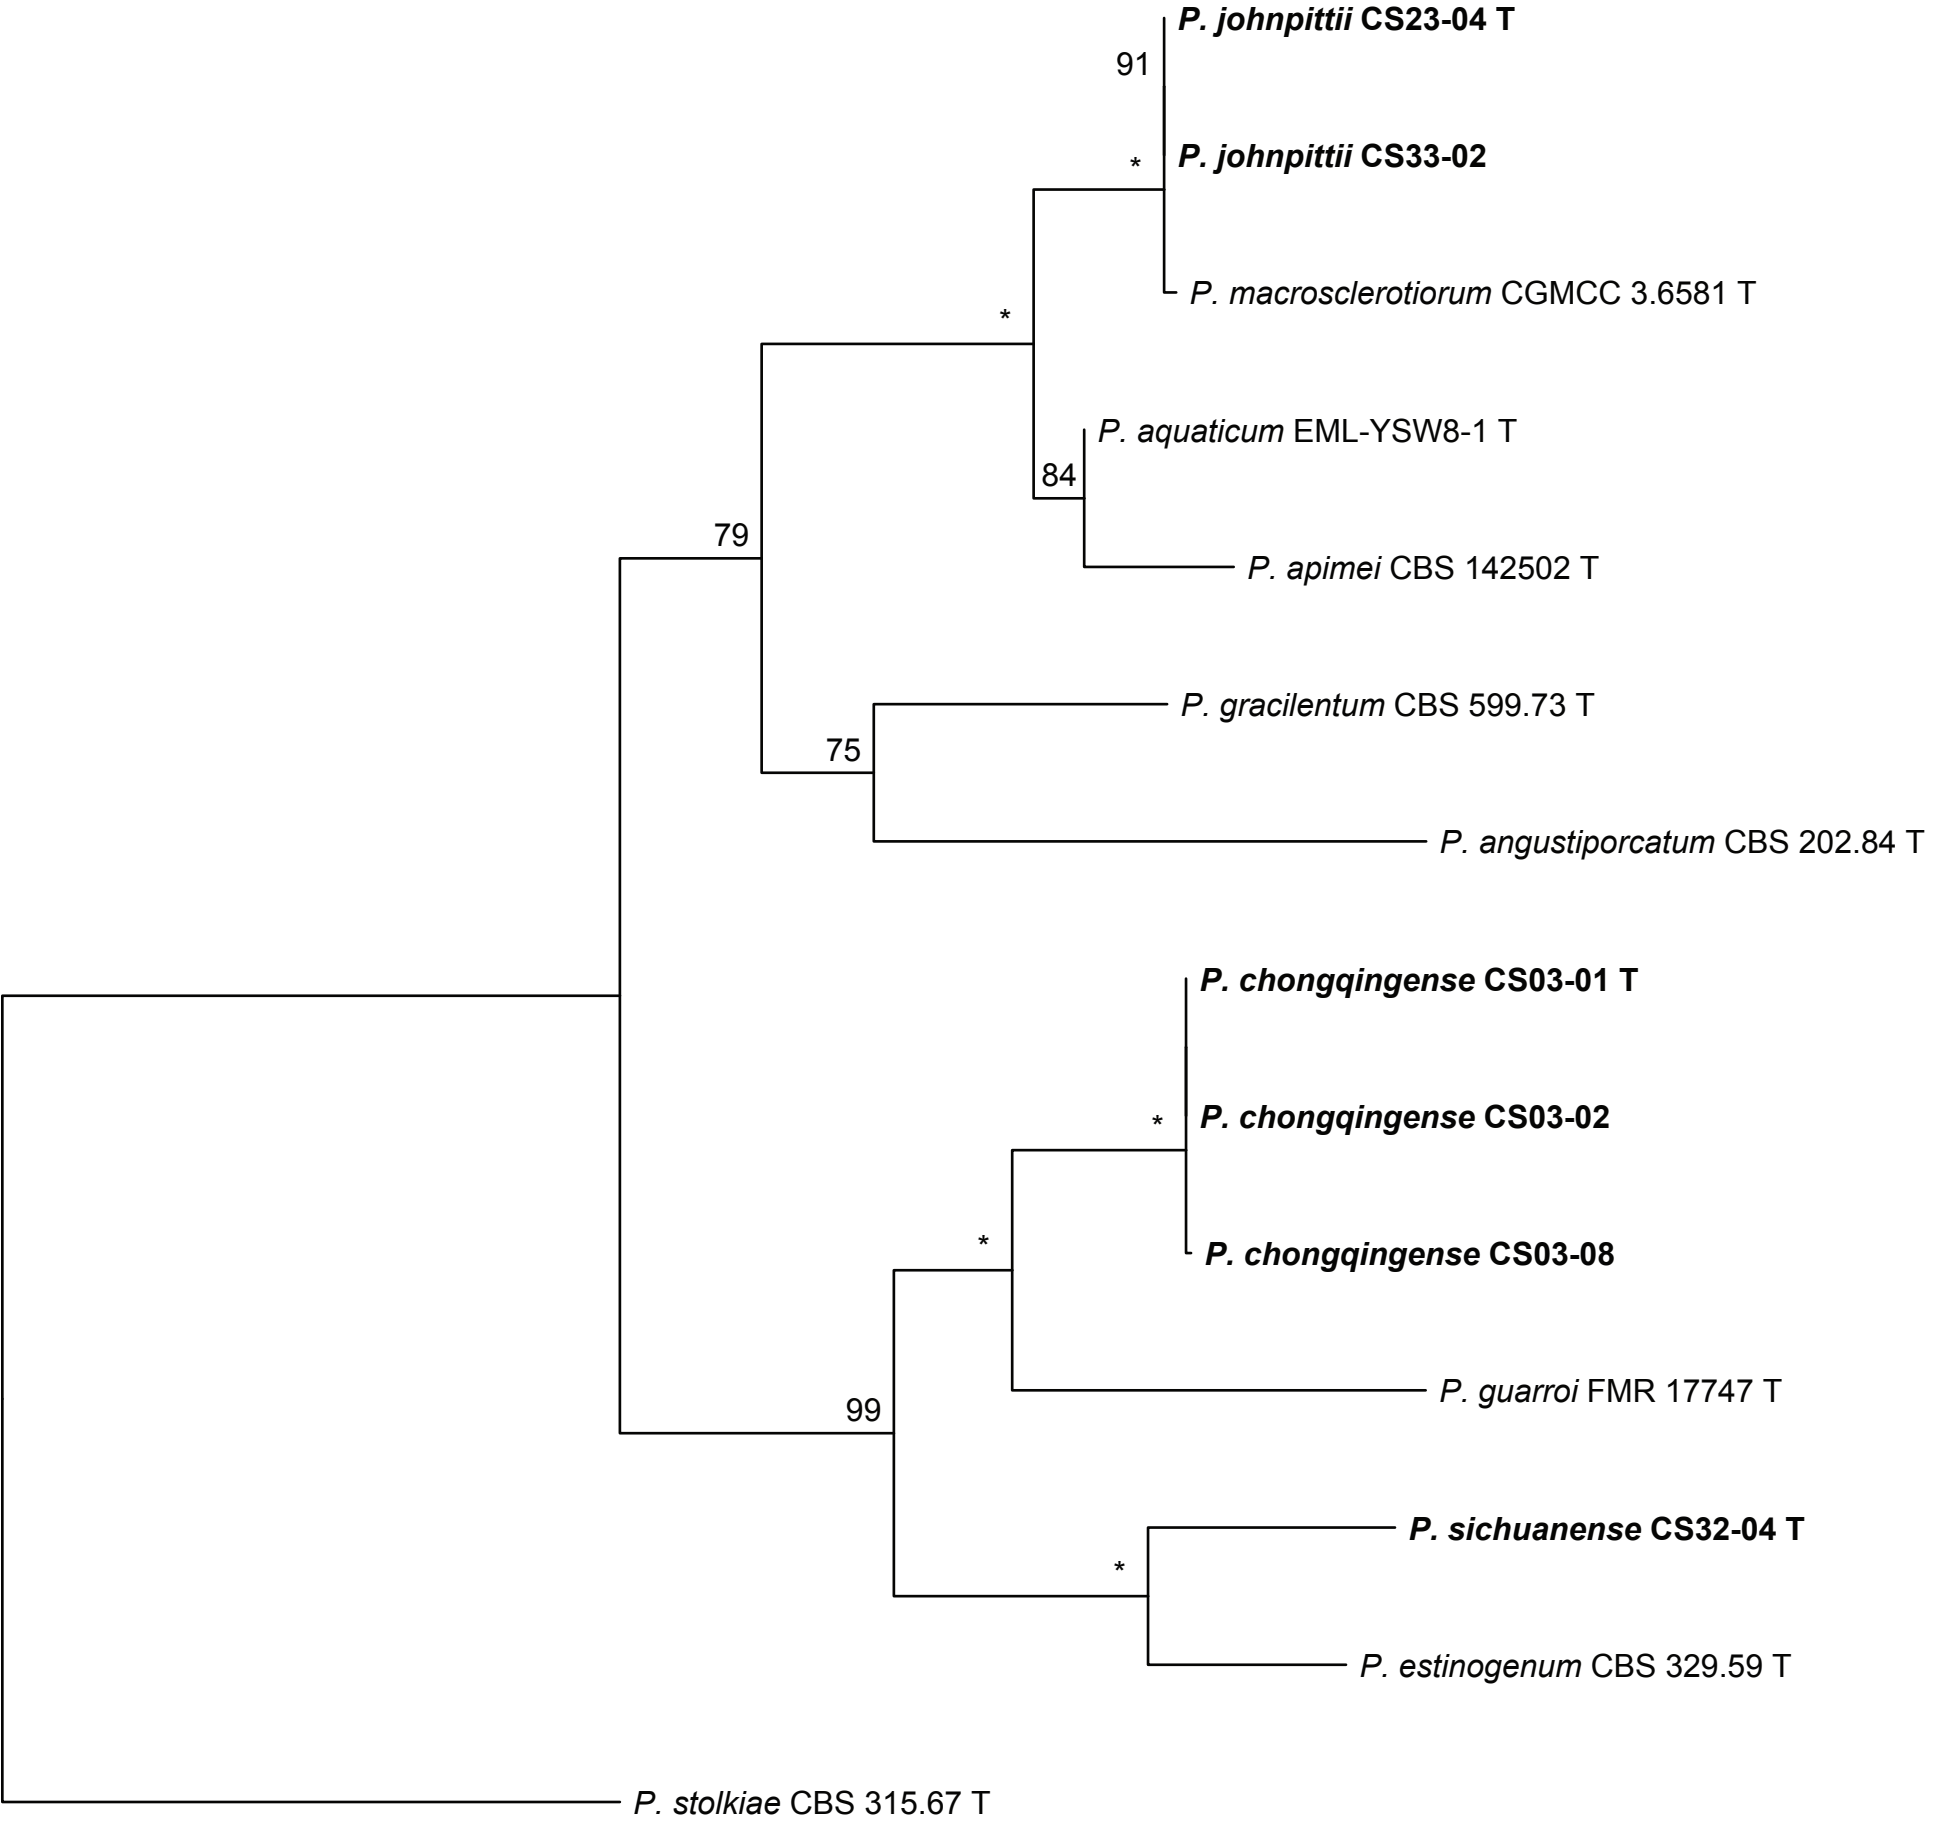

0.1

Supplement: s1 [file s1]

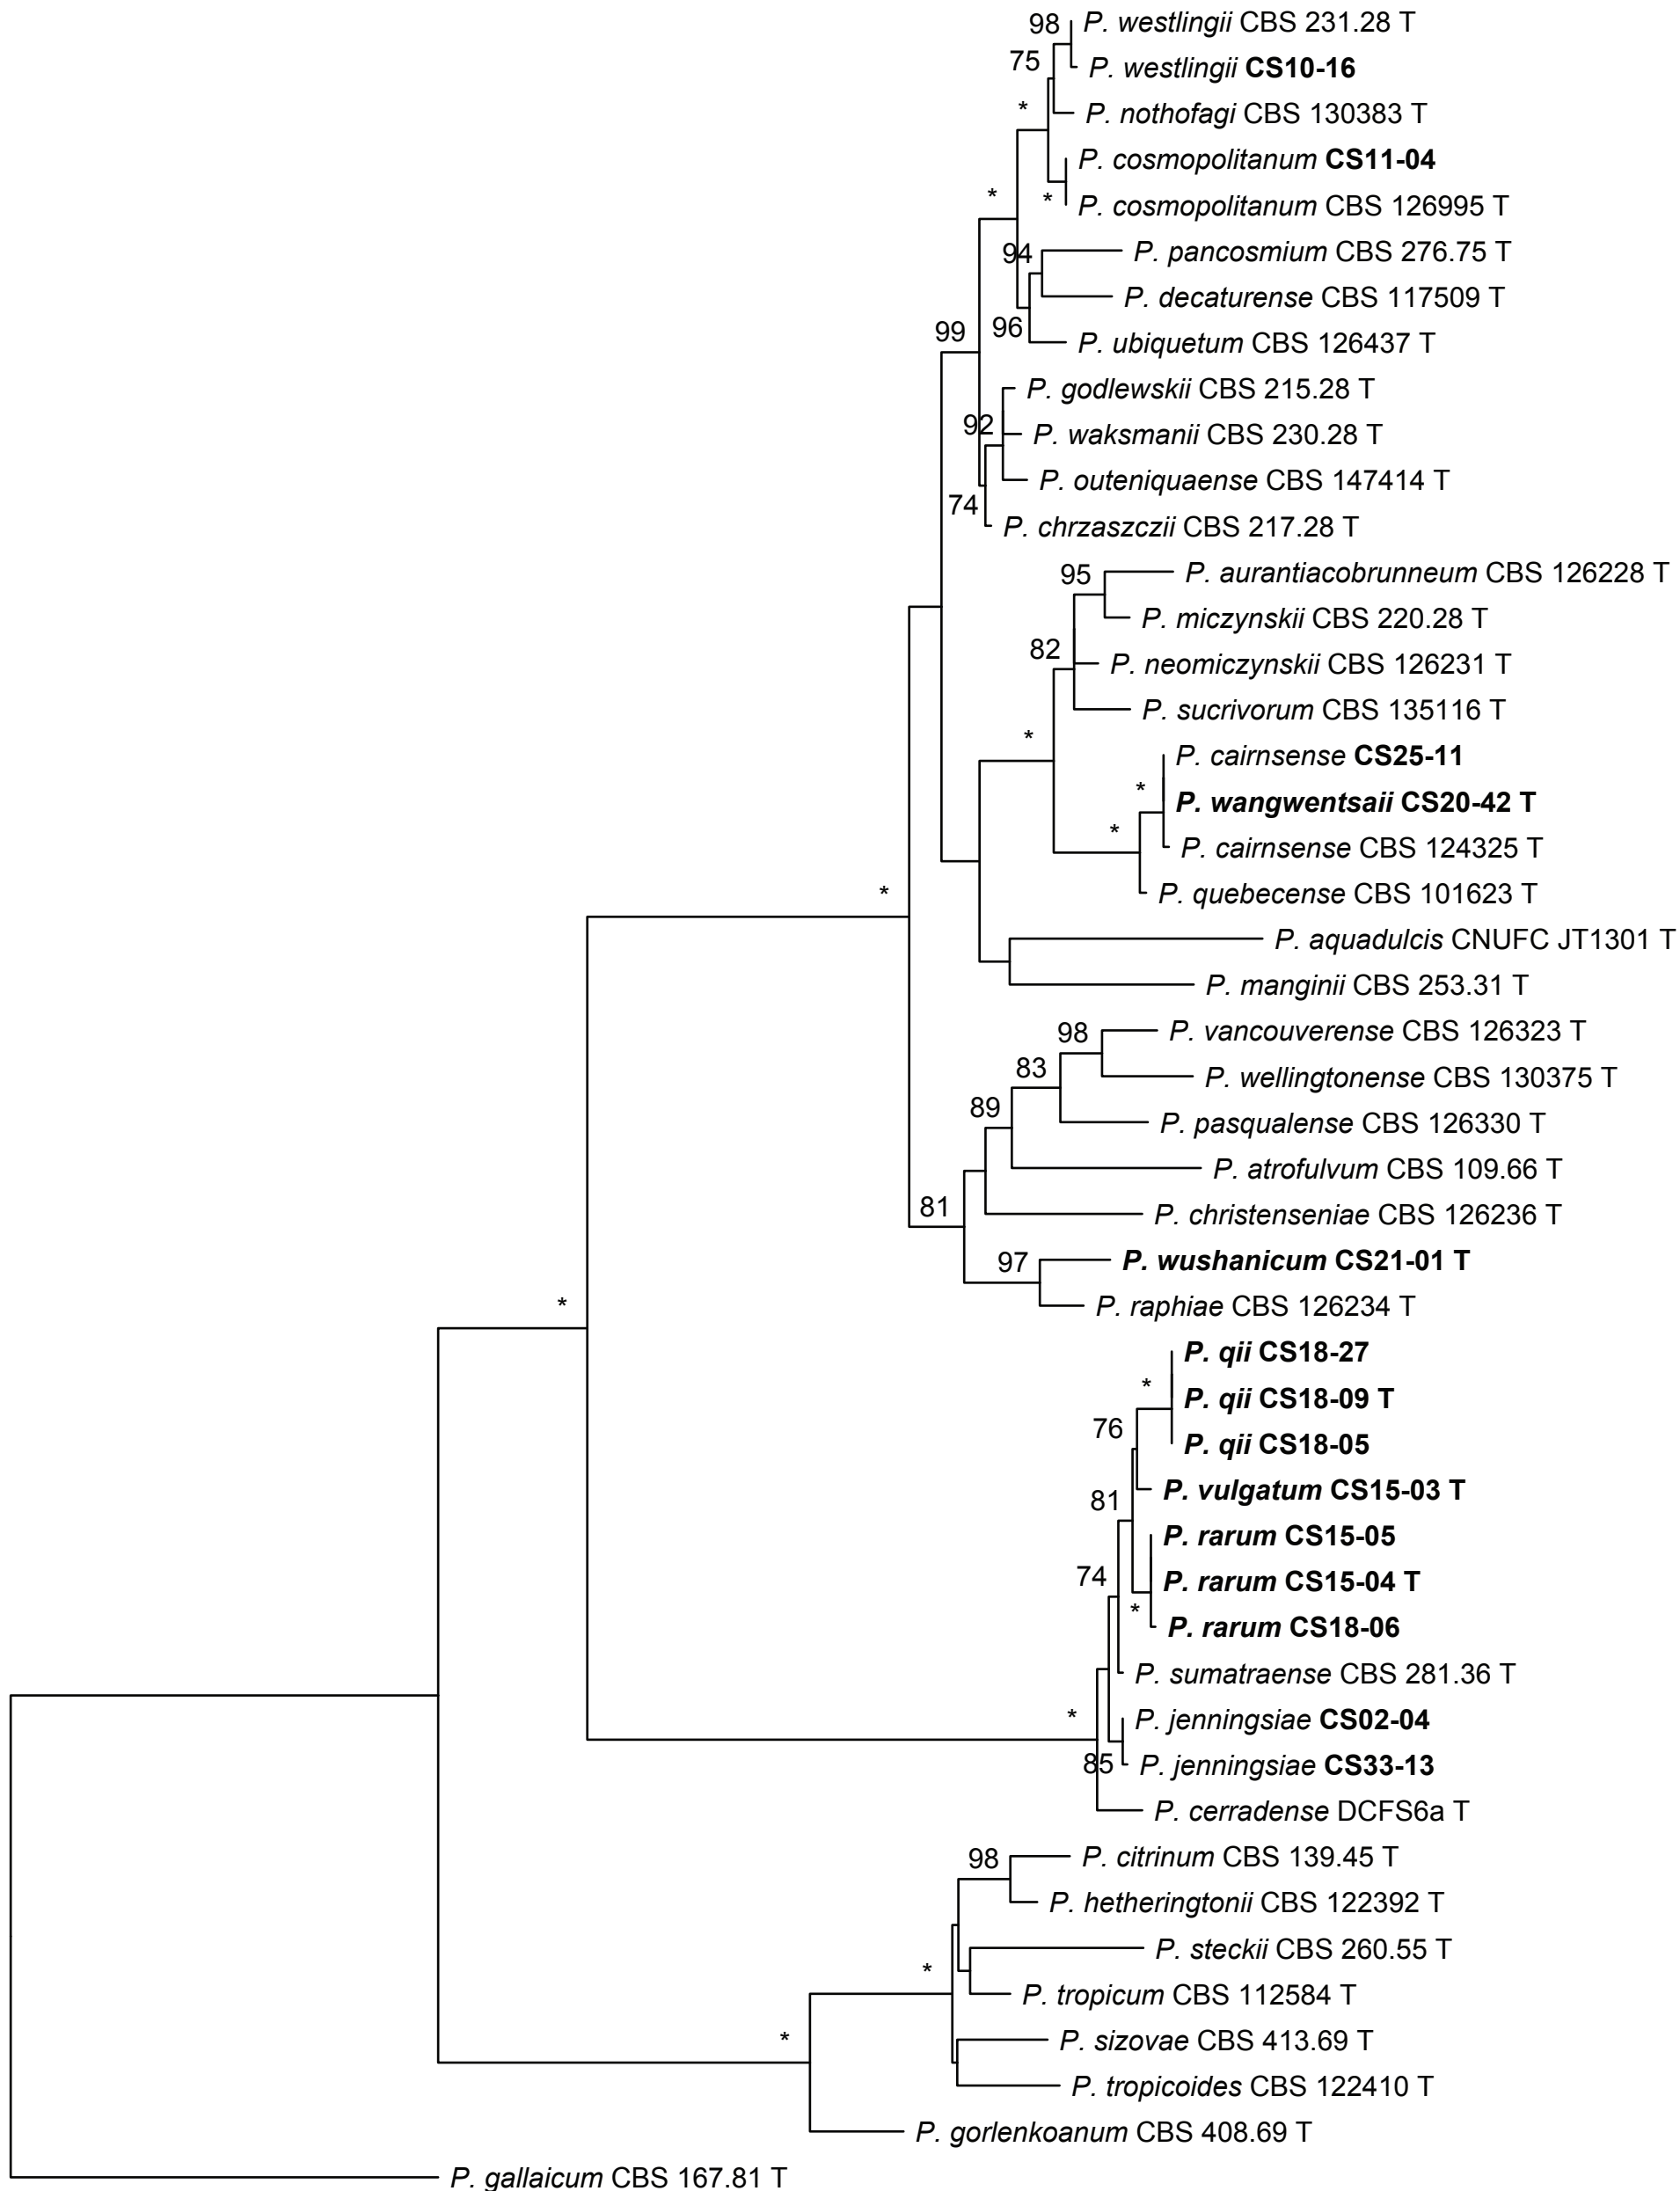

Supplement: s1 [file s1]

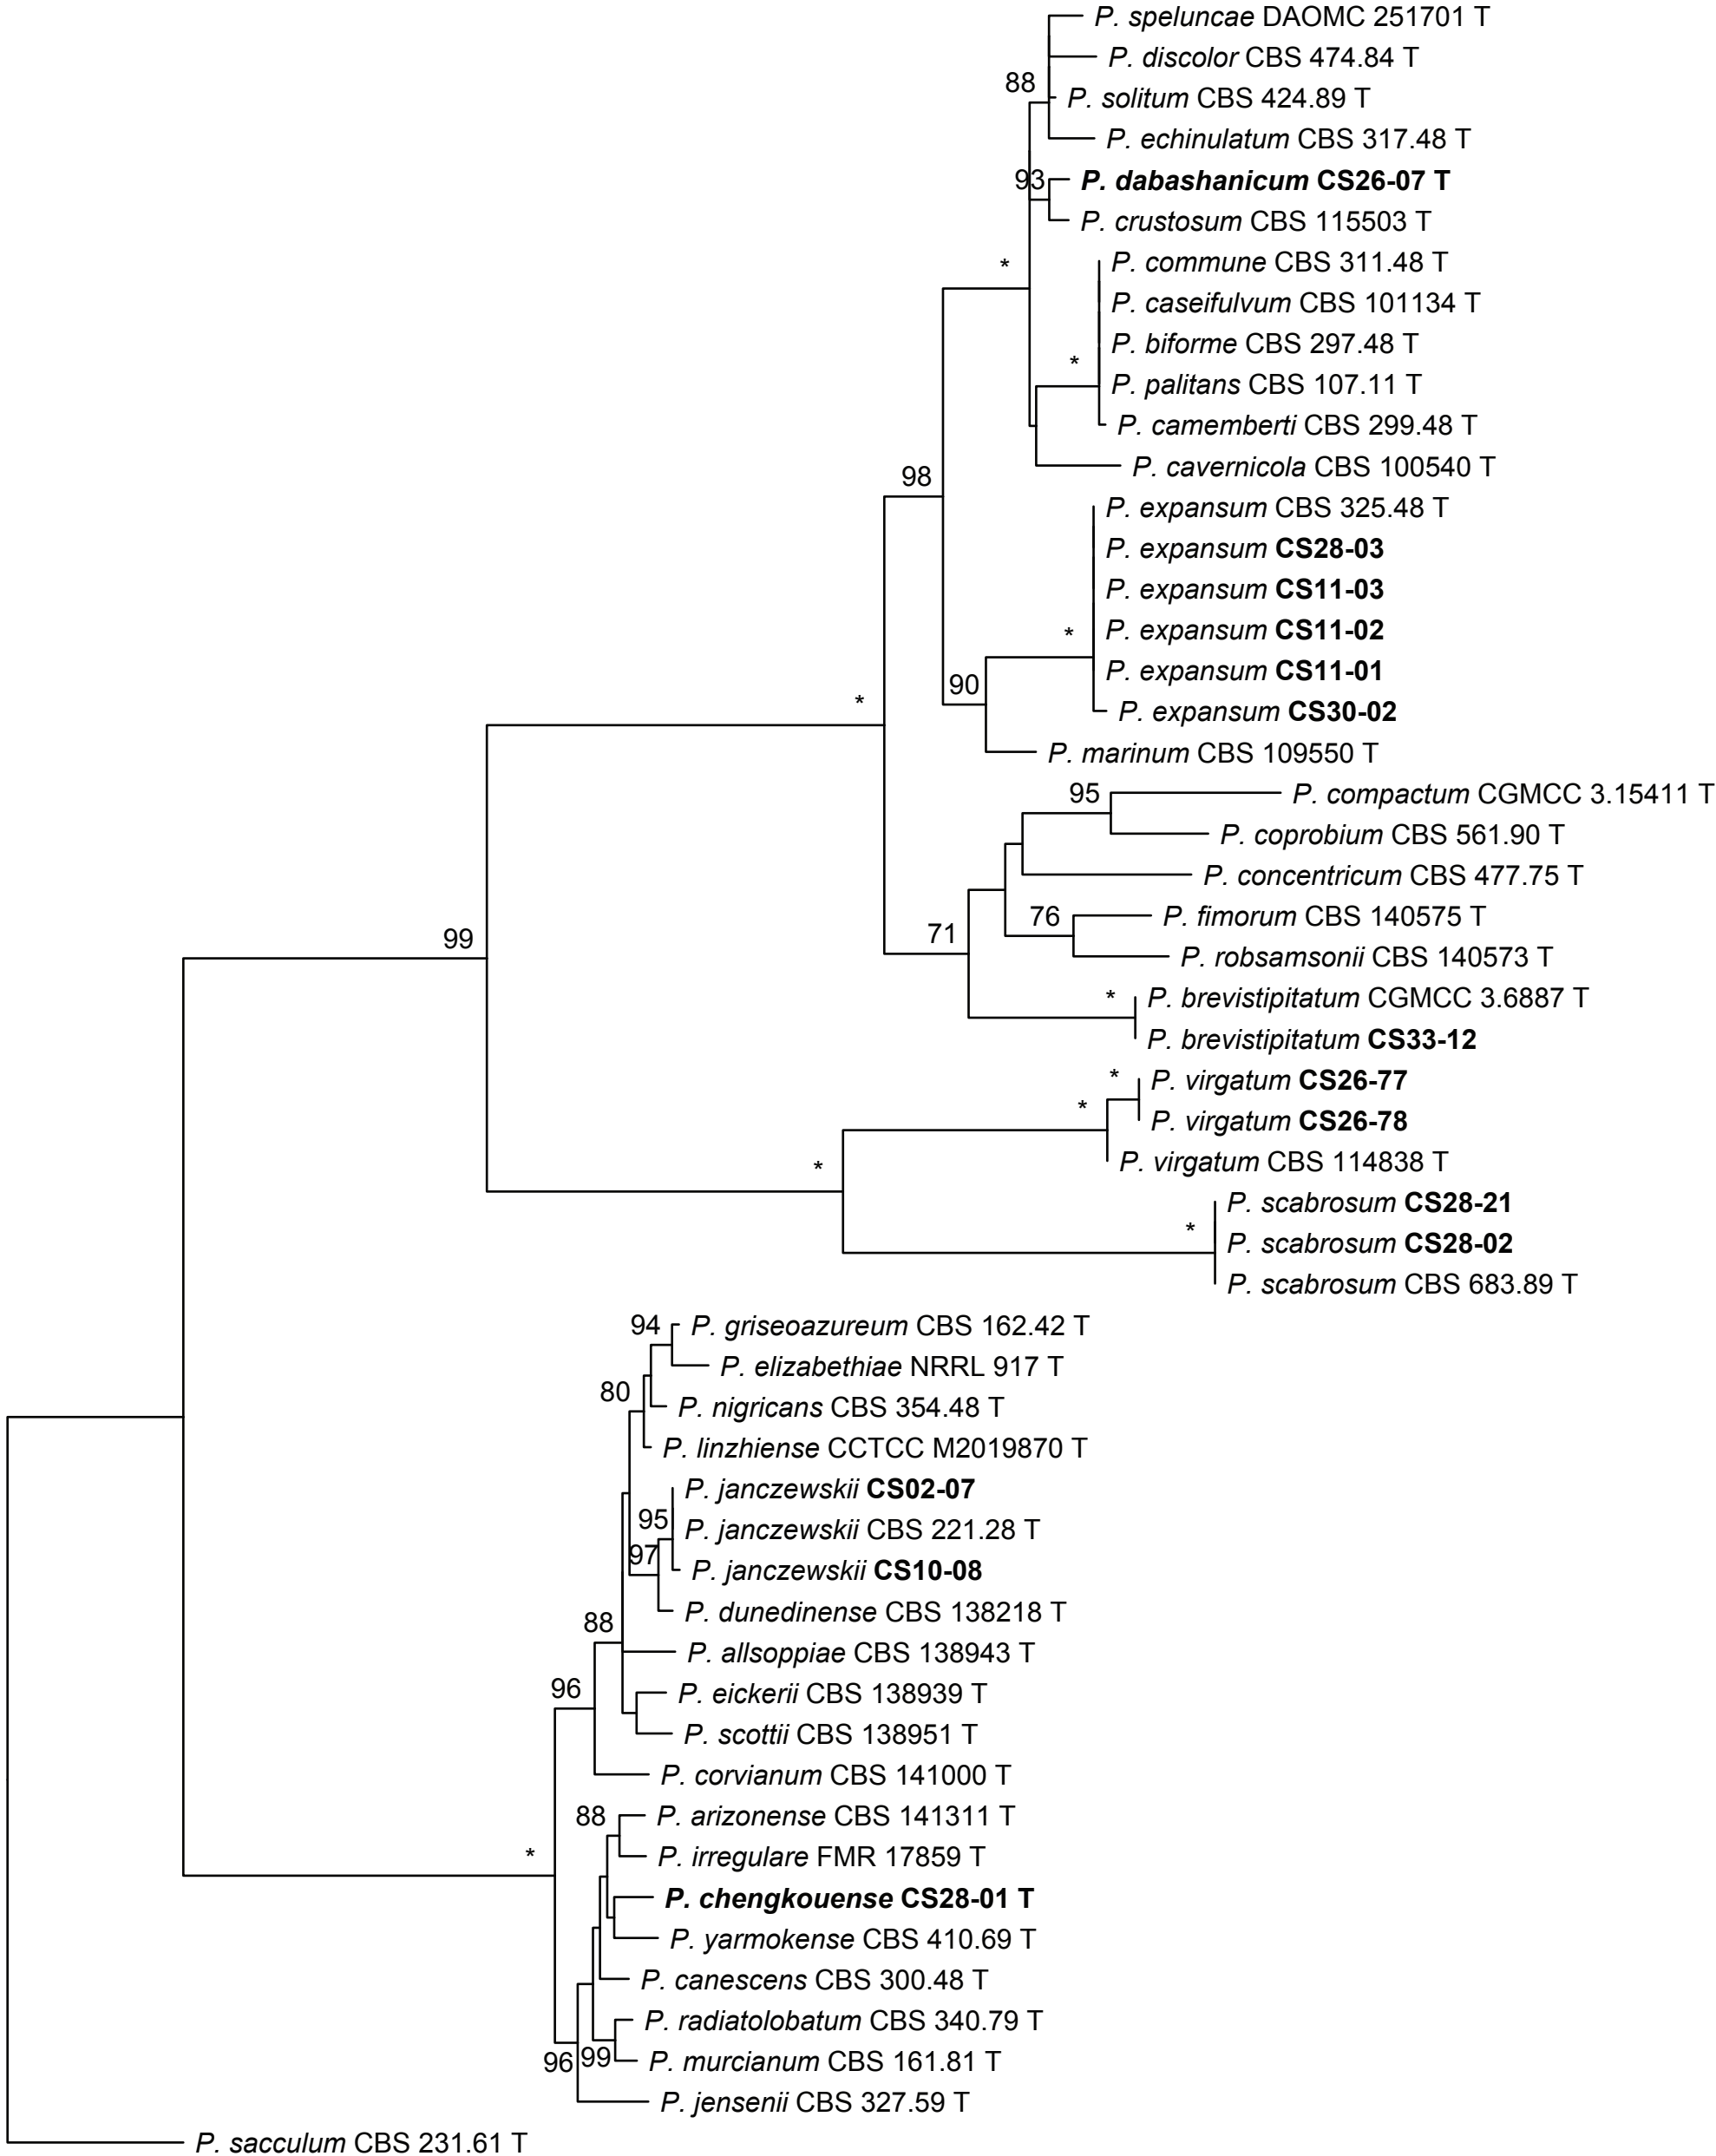

Supplement: s1 [file s1]

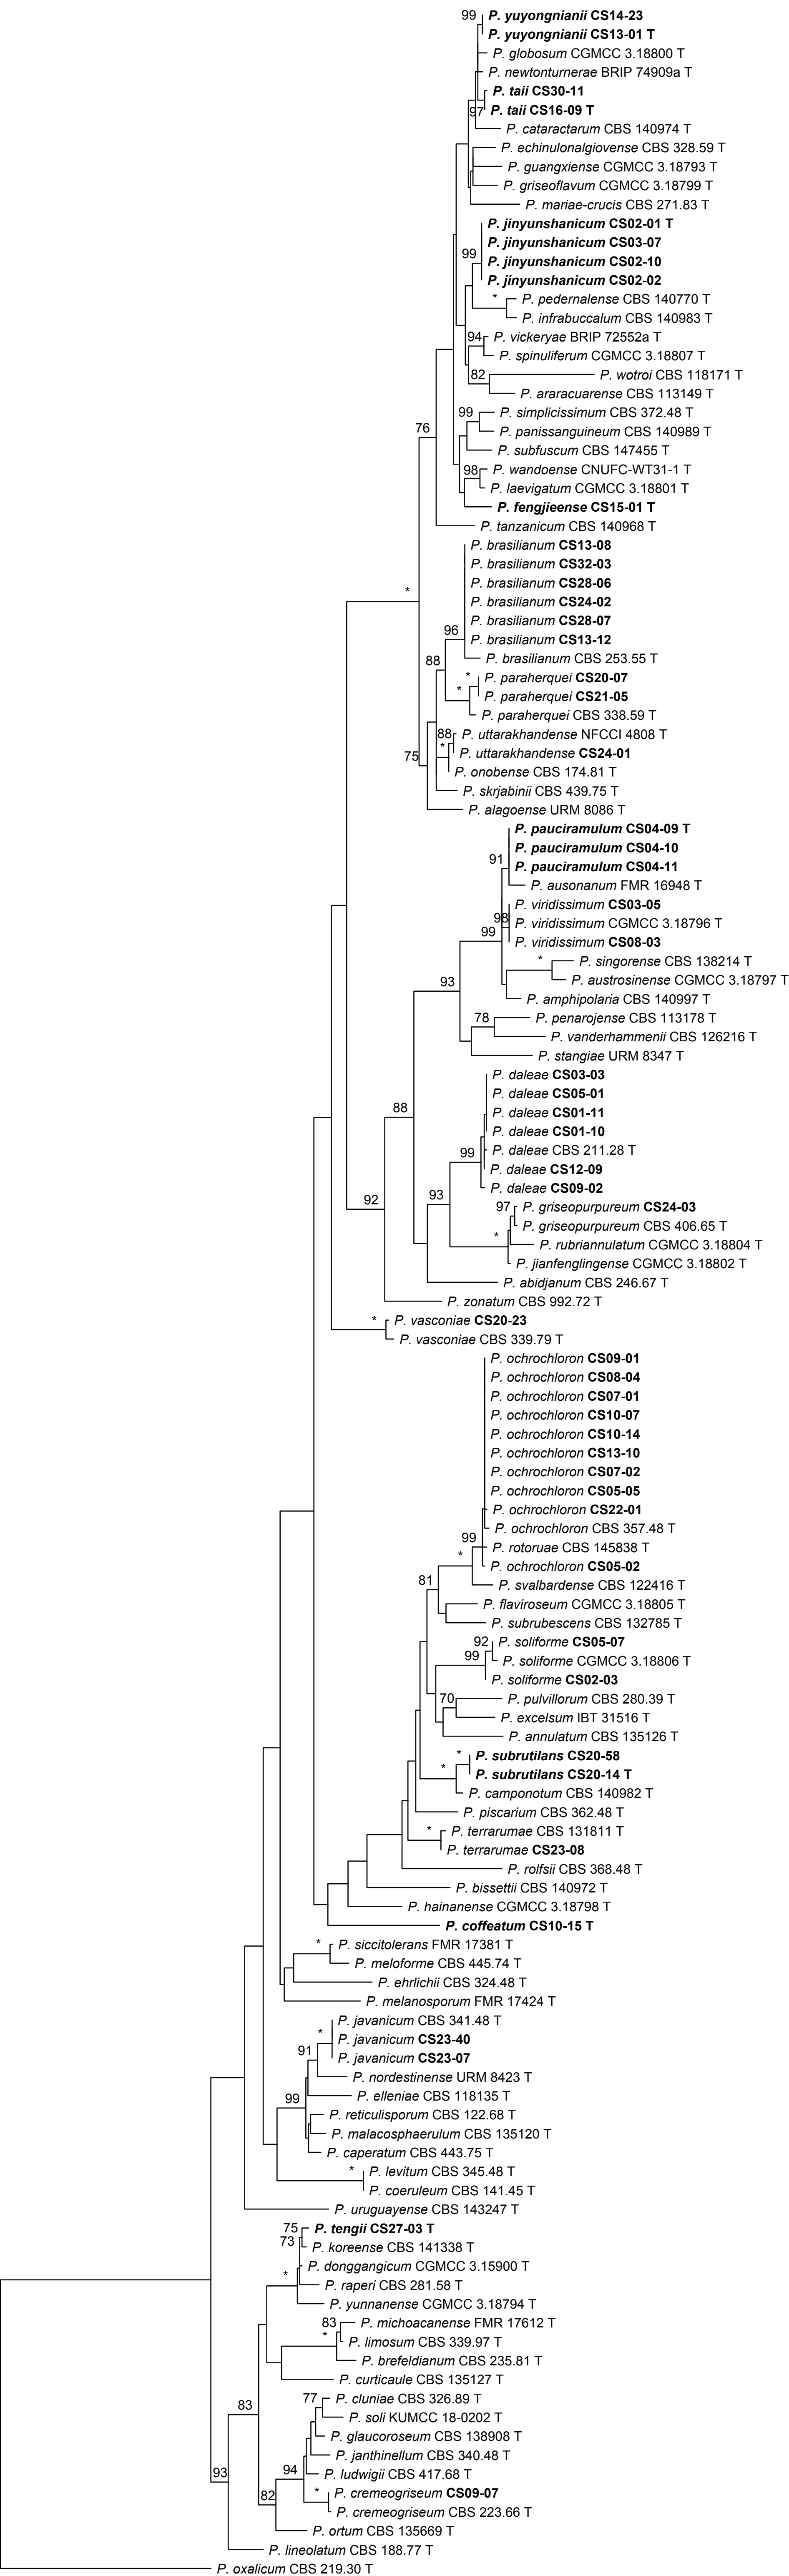

Supplement: s1 [file s1]

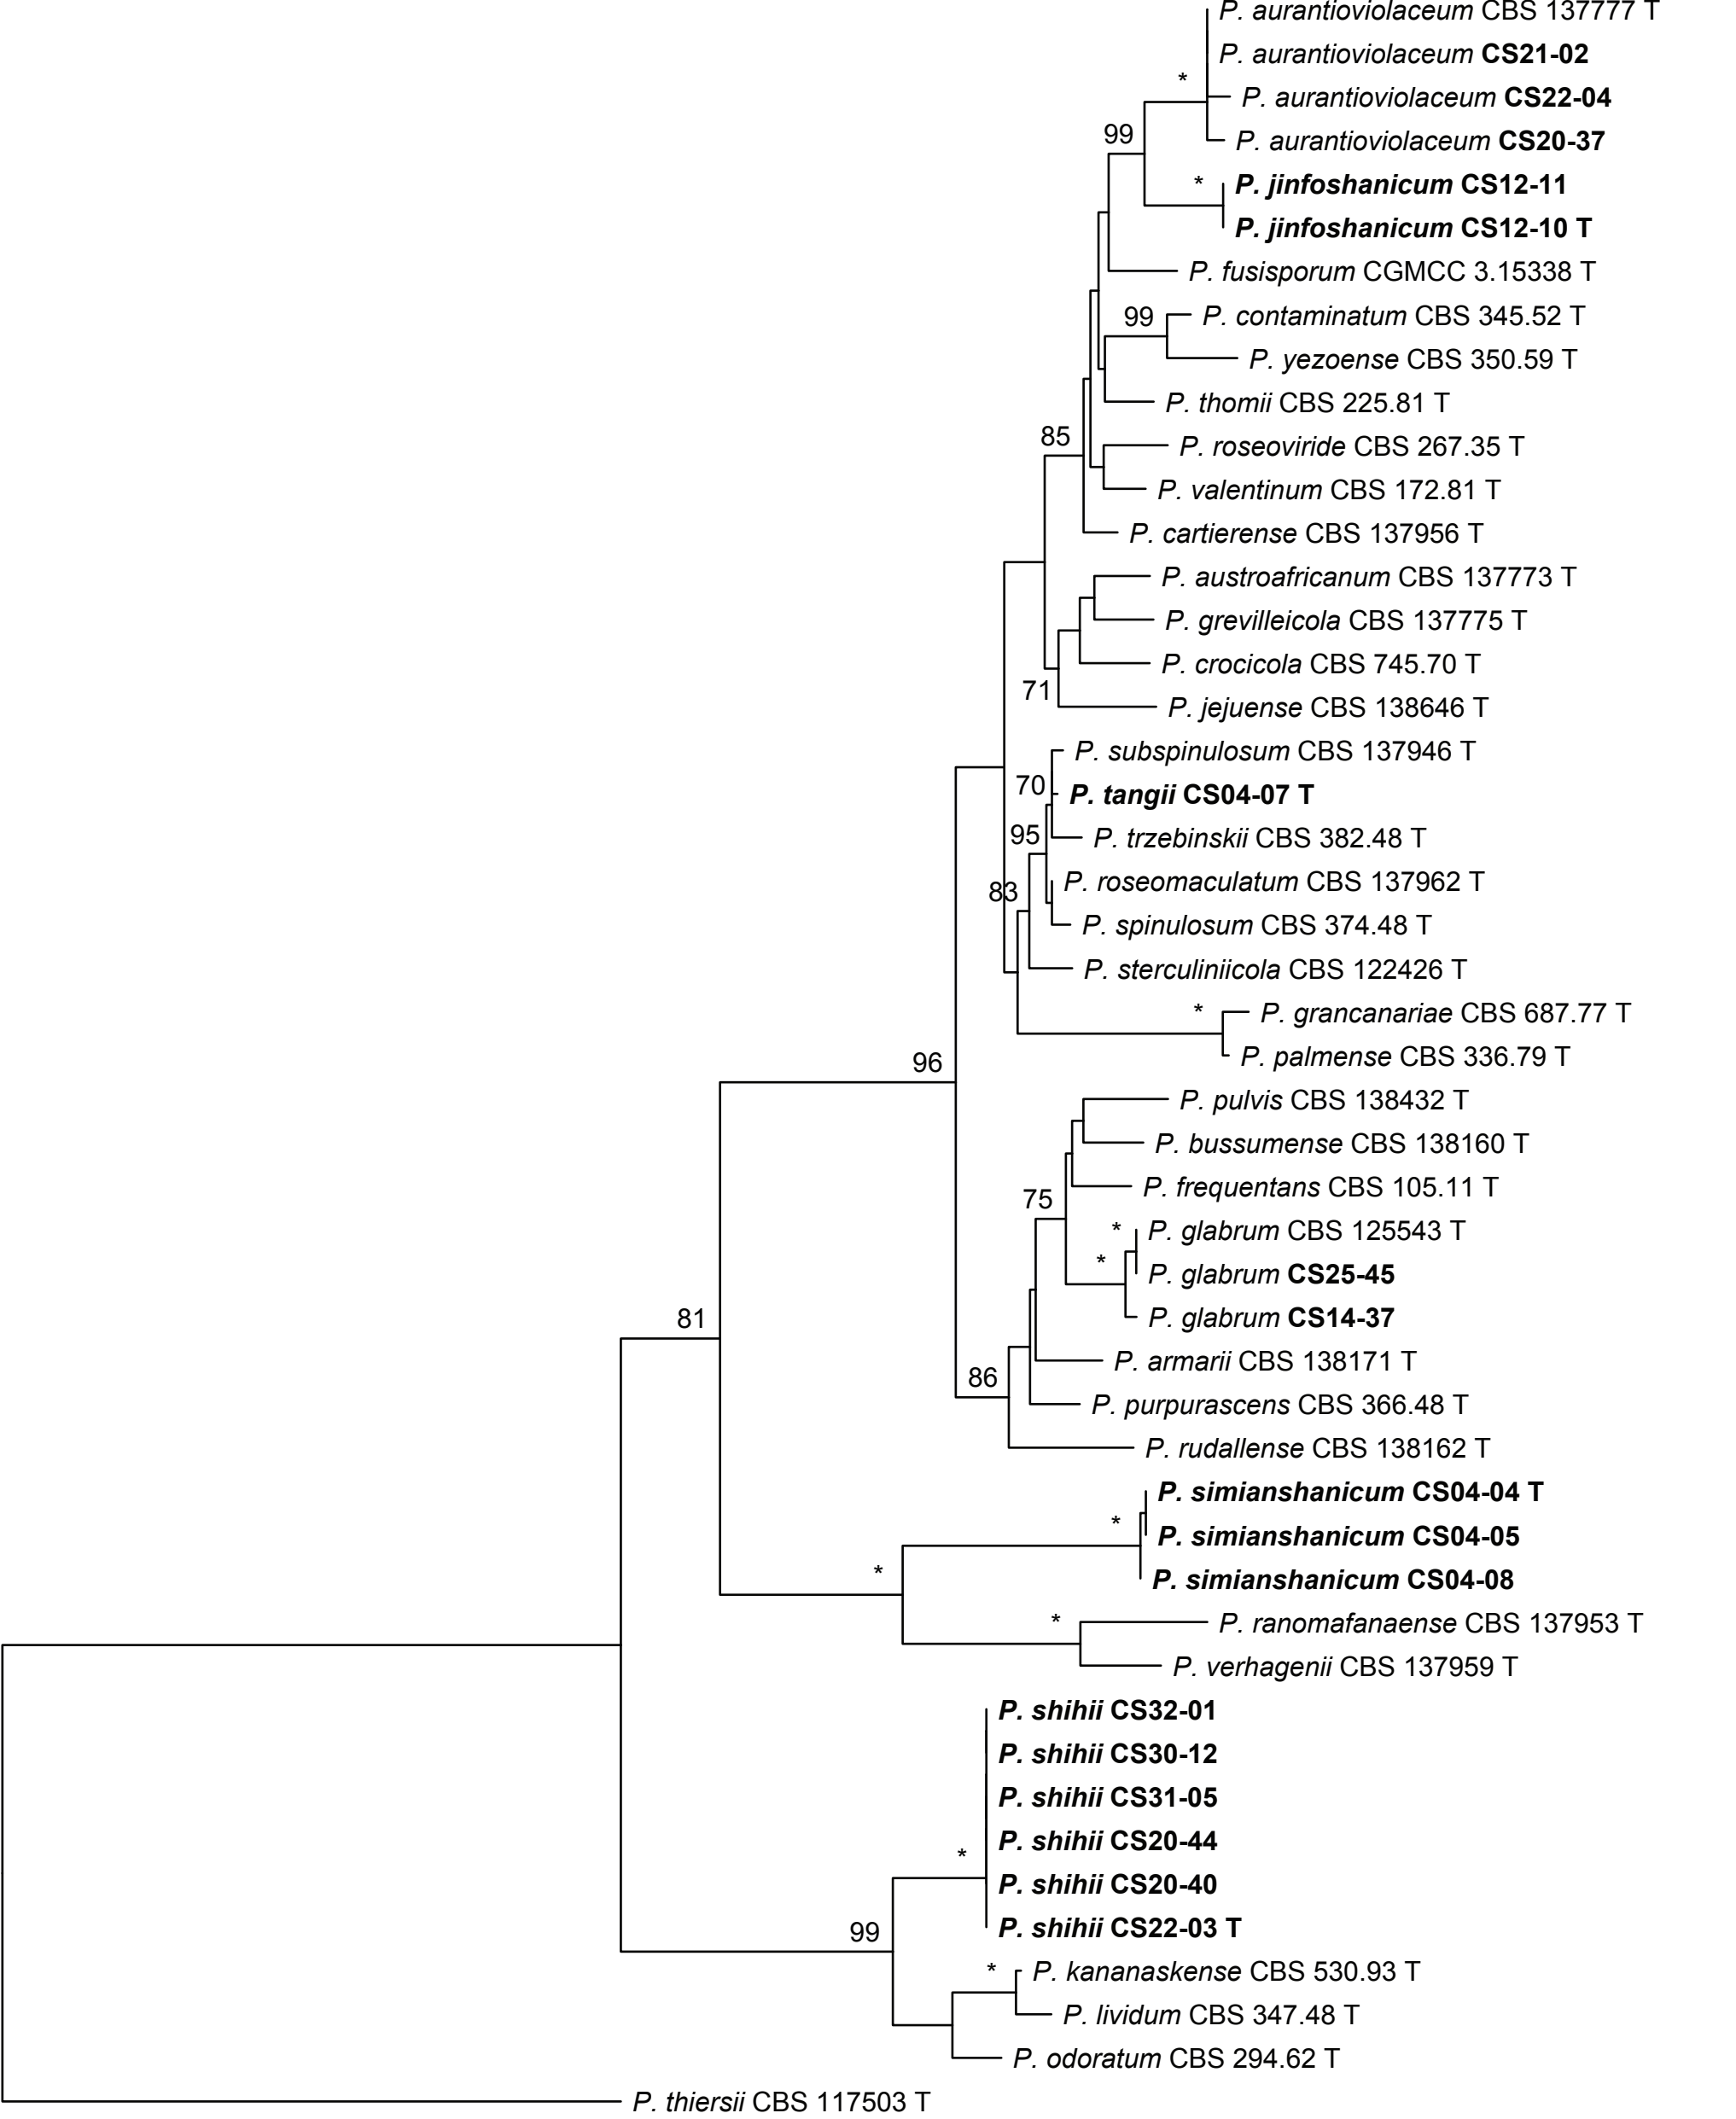

Supplement: s1 [file s1]

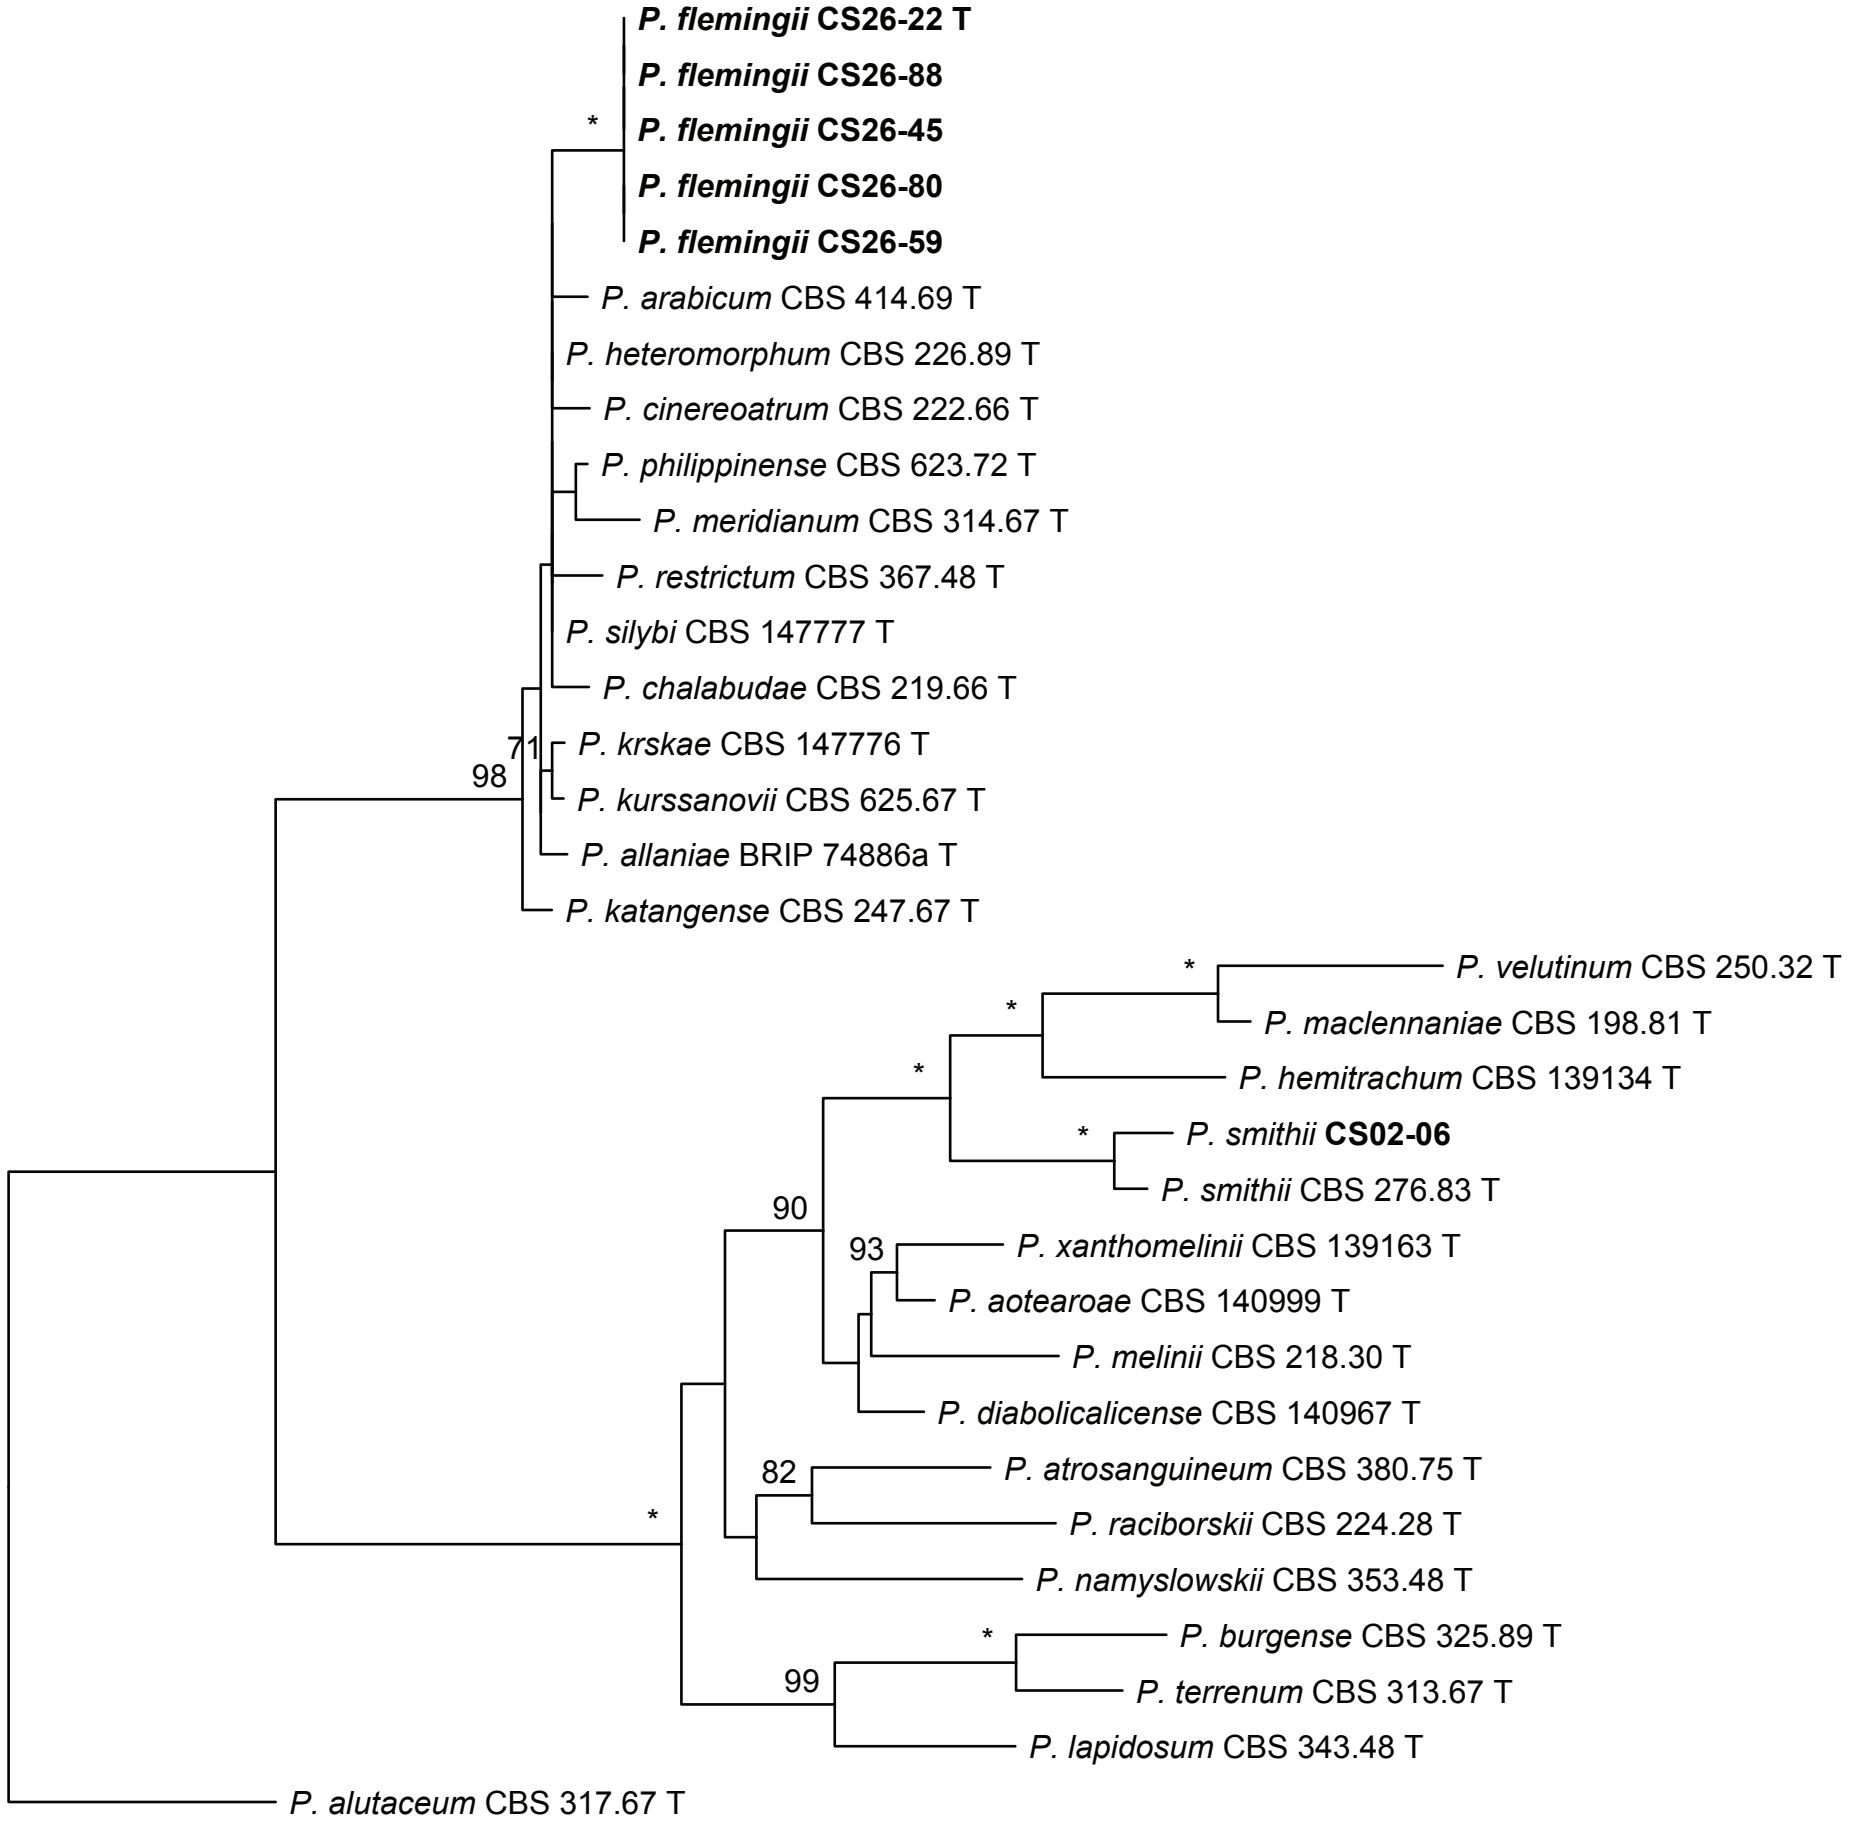

0.04

Supplement: s1 [file s1]

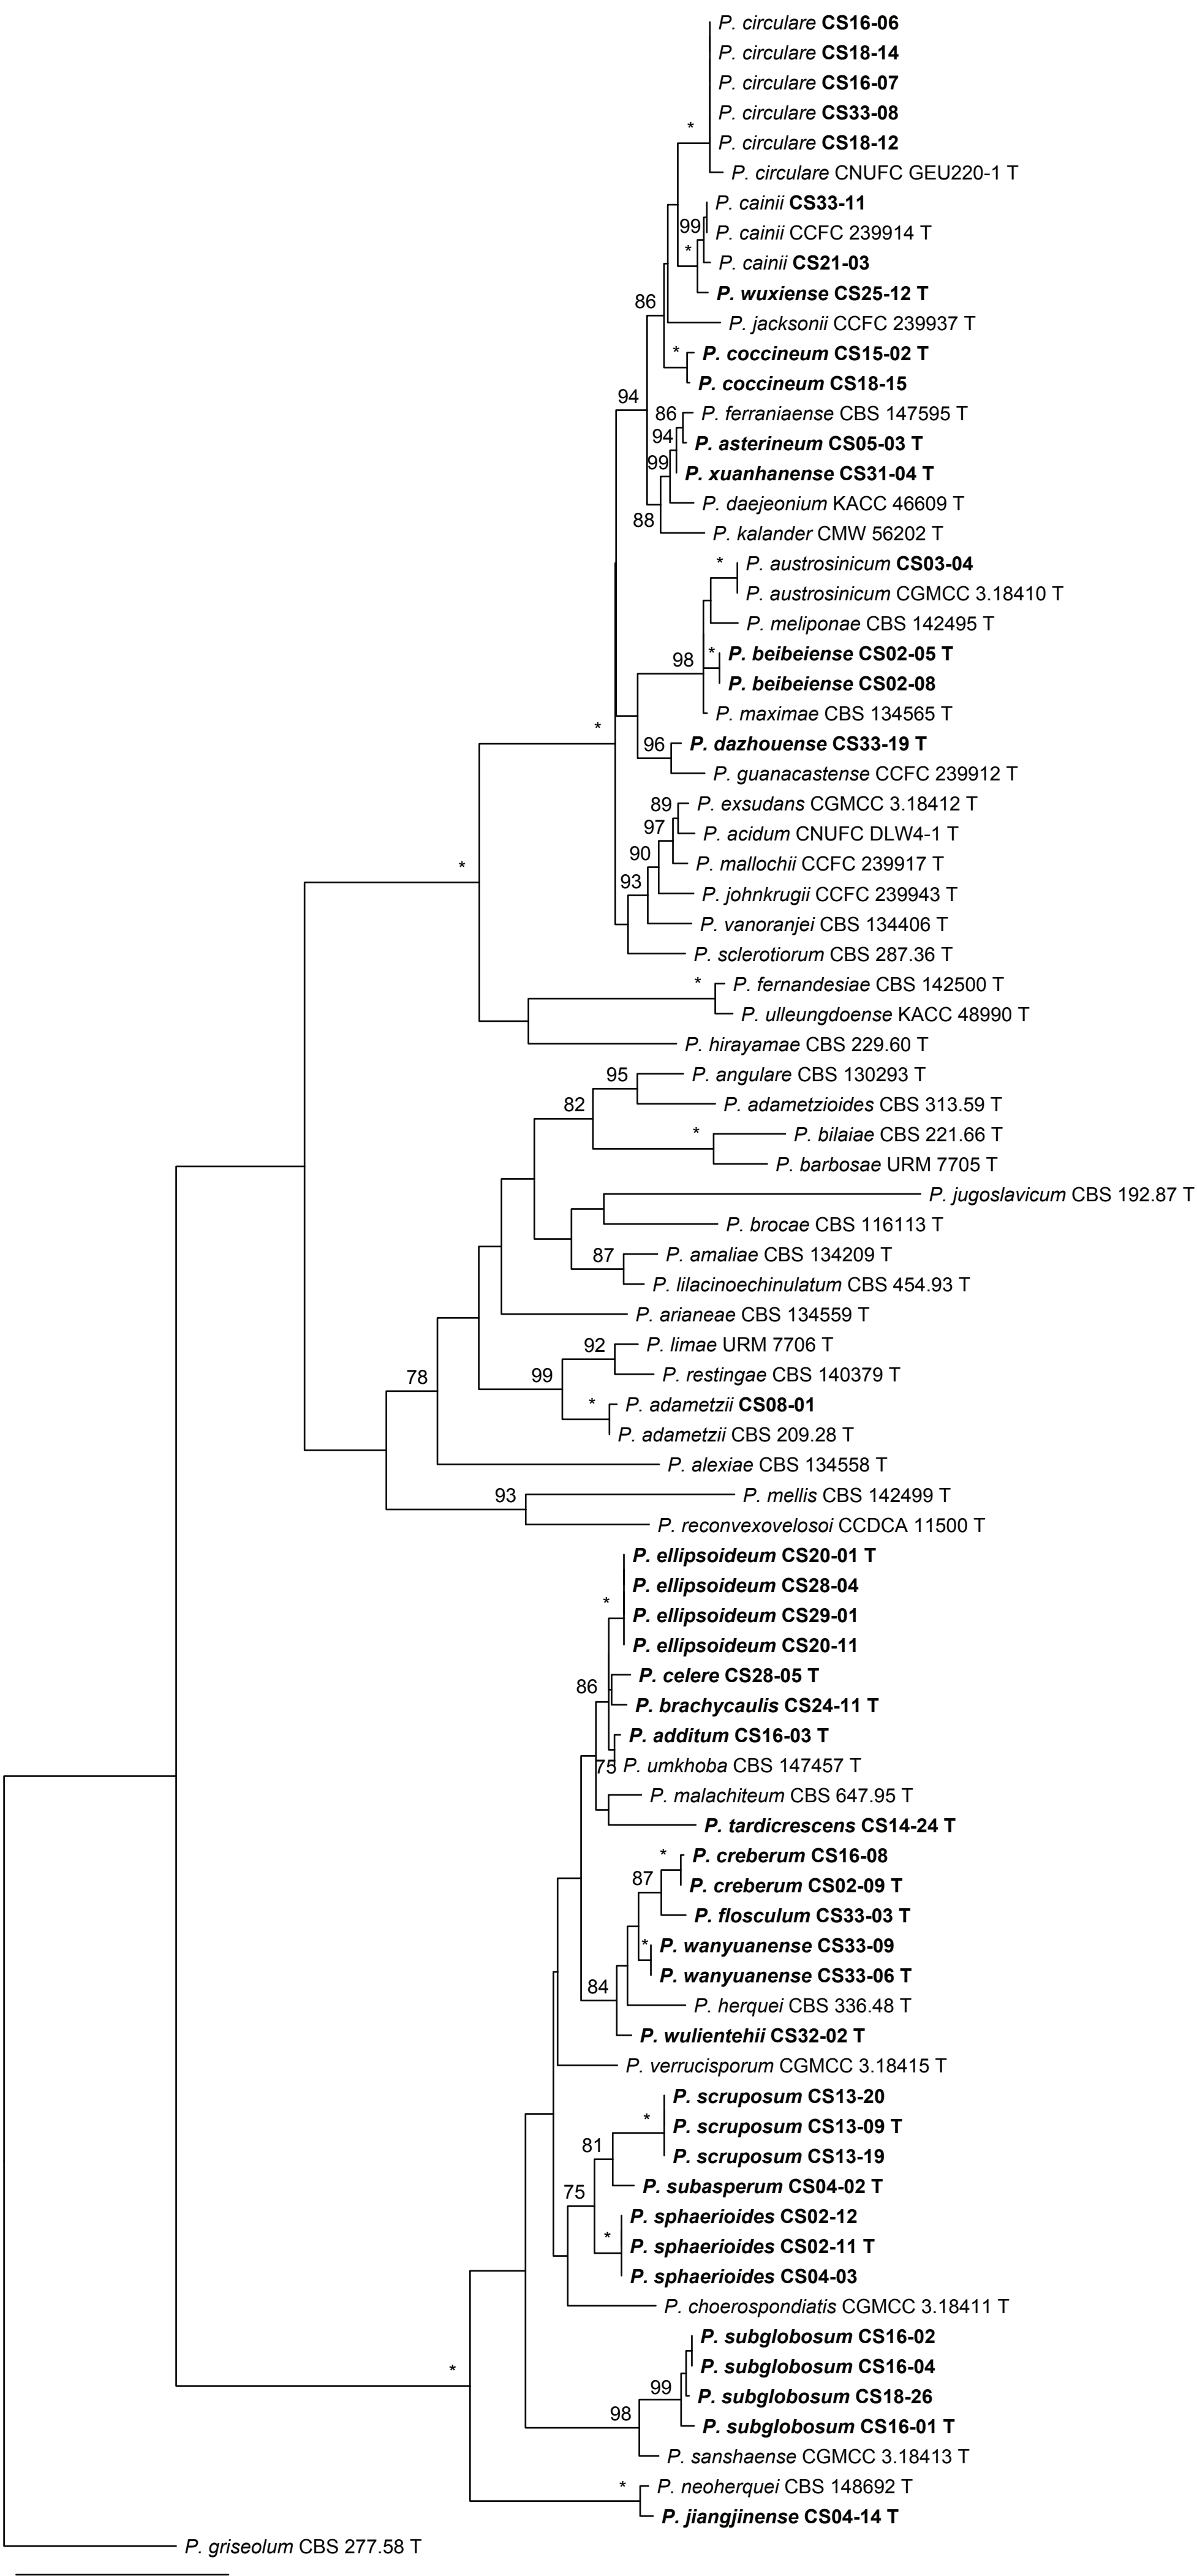

Supplement: s1 [file s1]

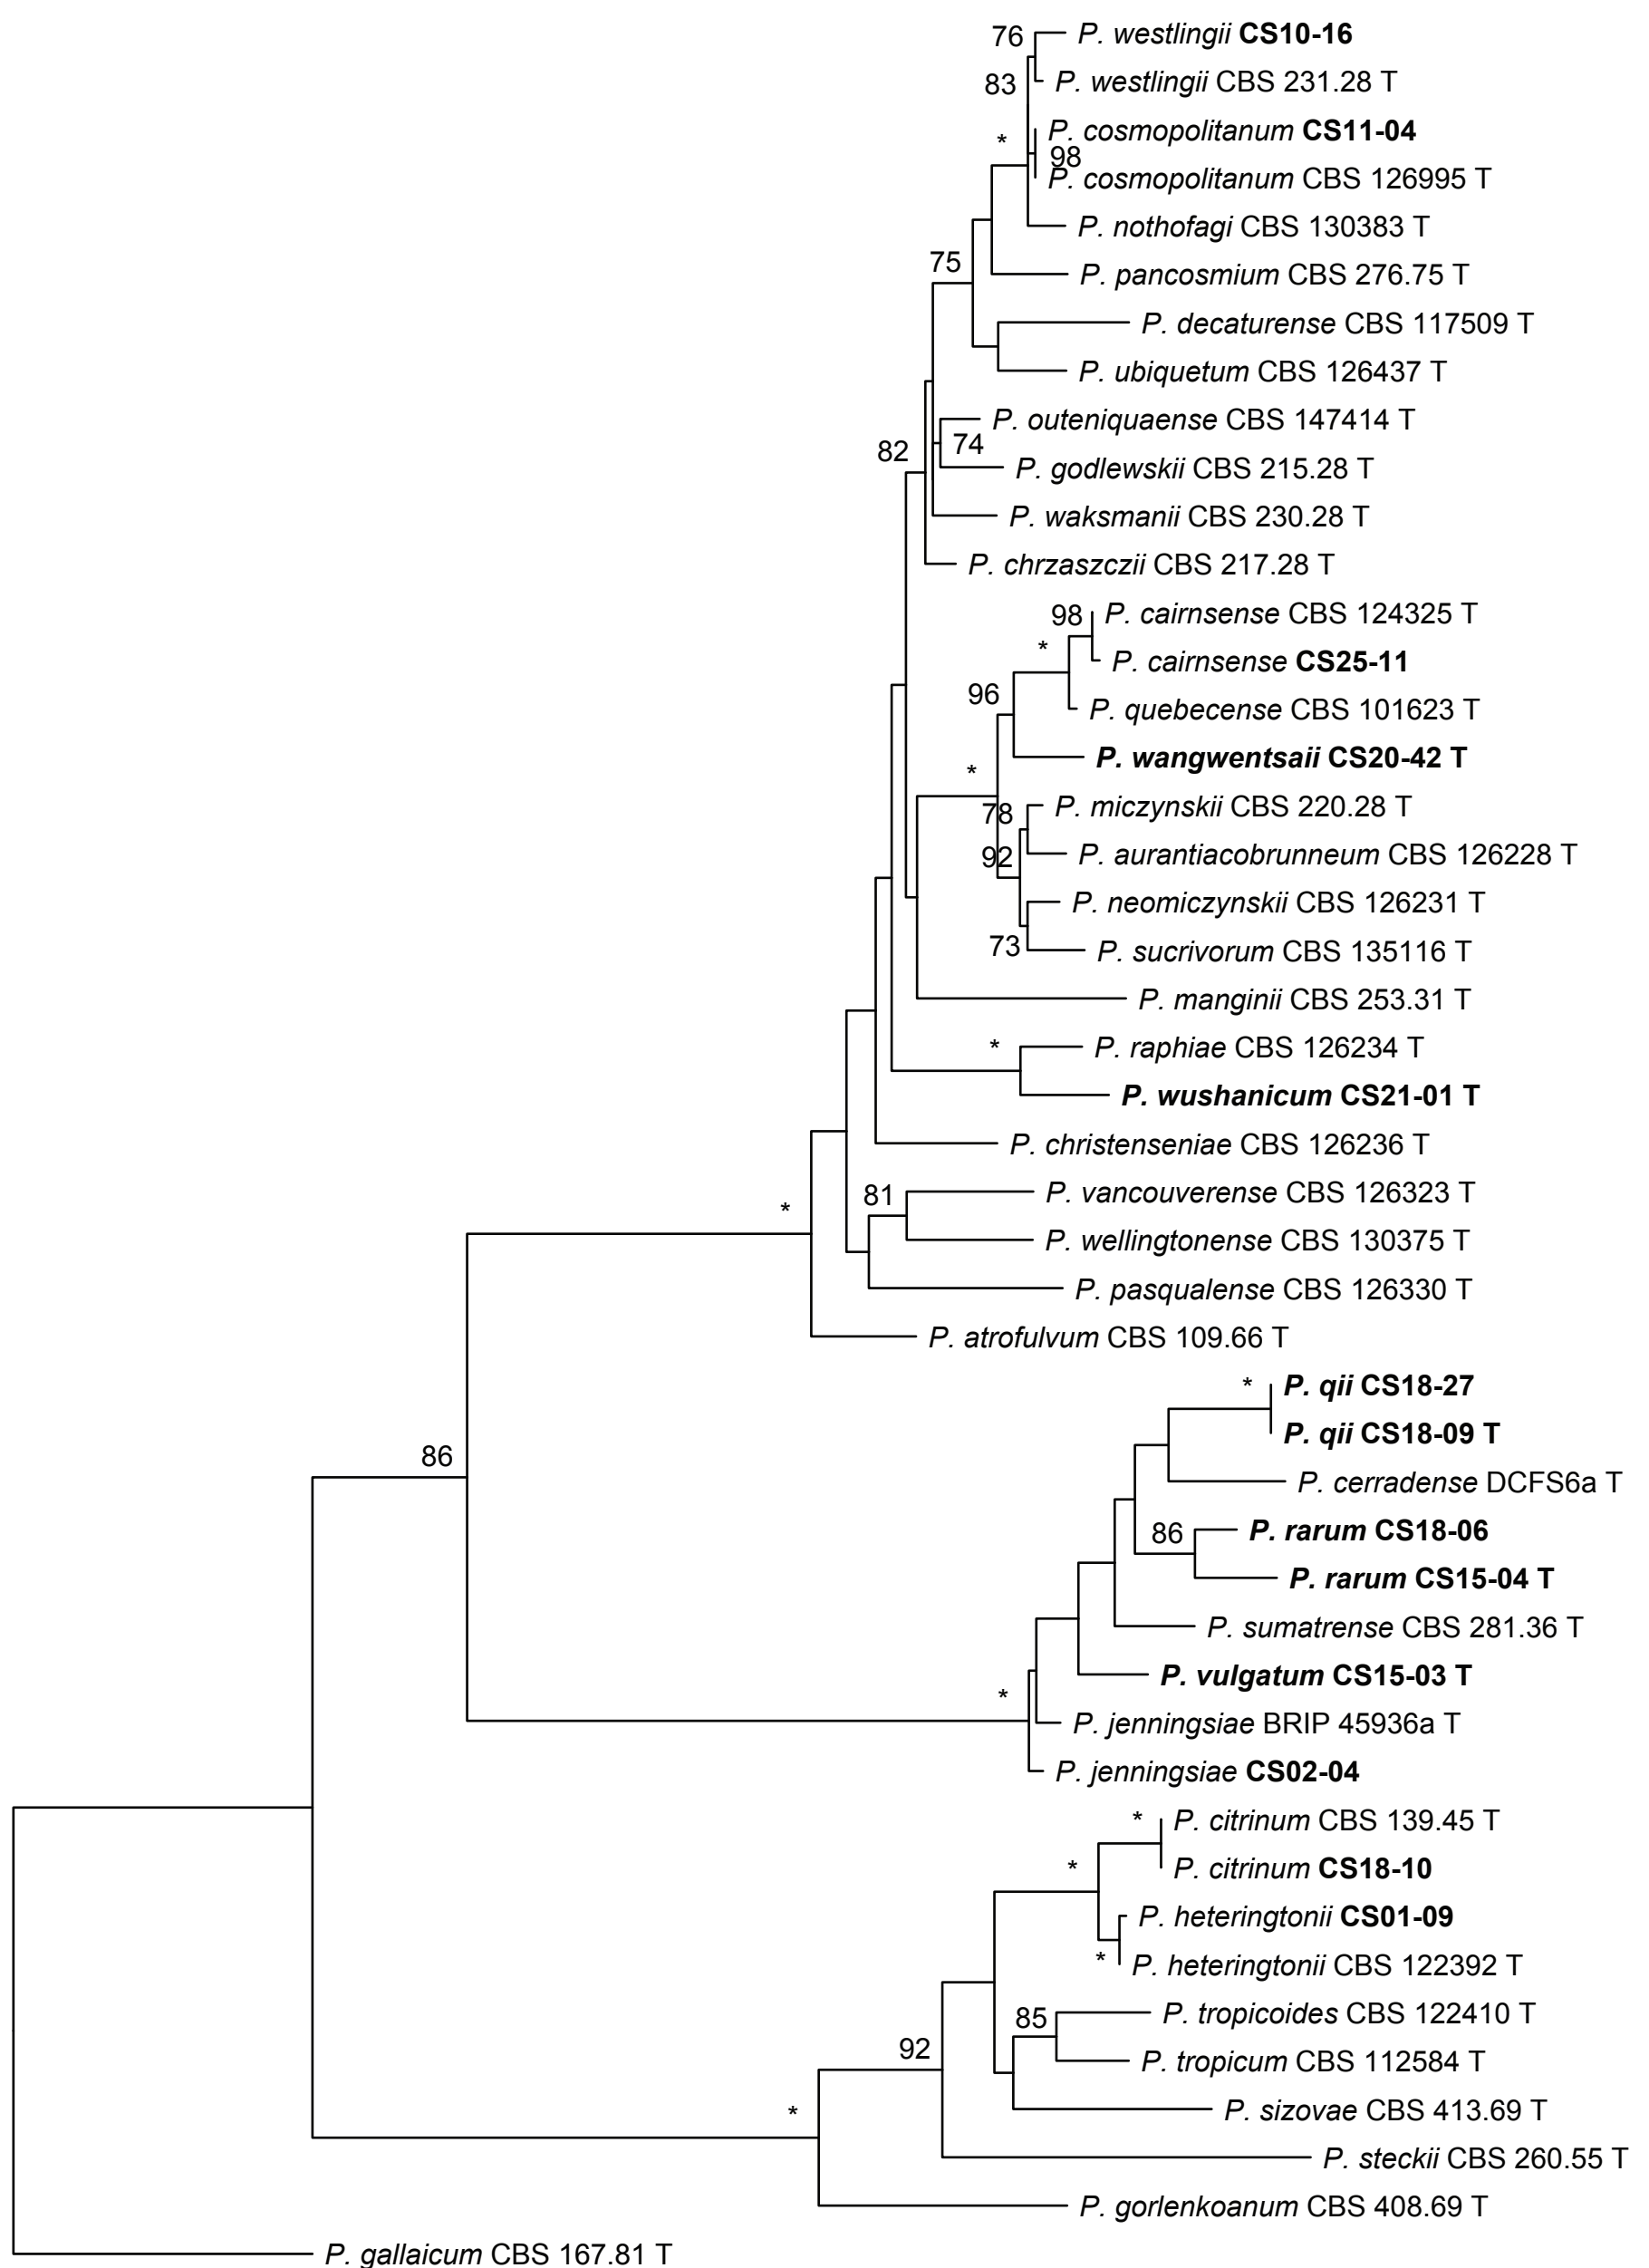

Supplement: s1 [file s1]

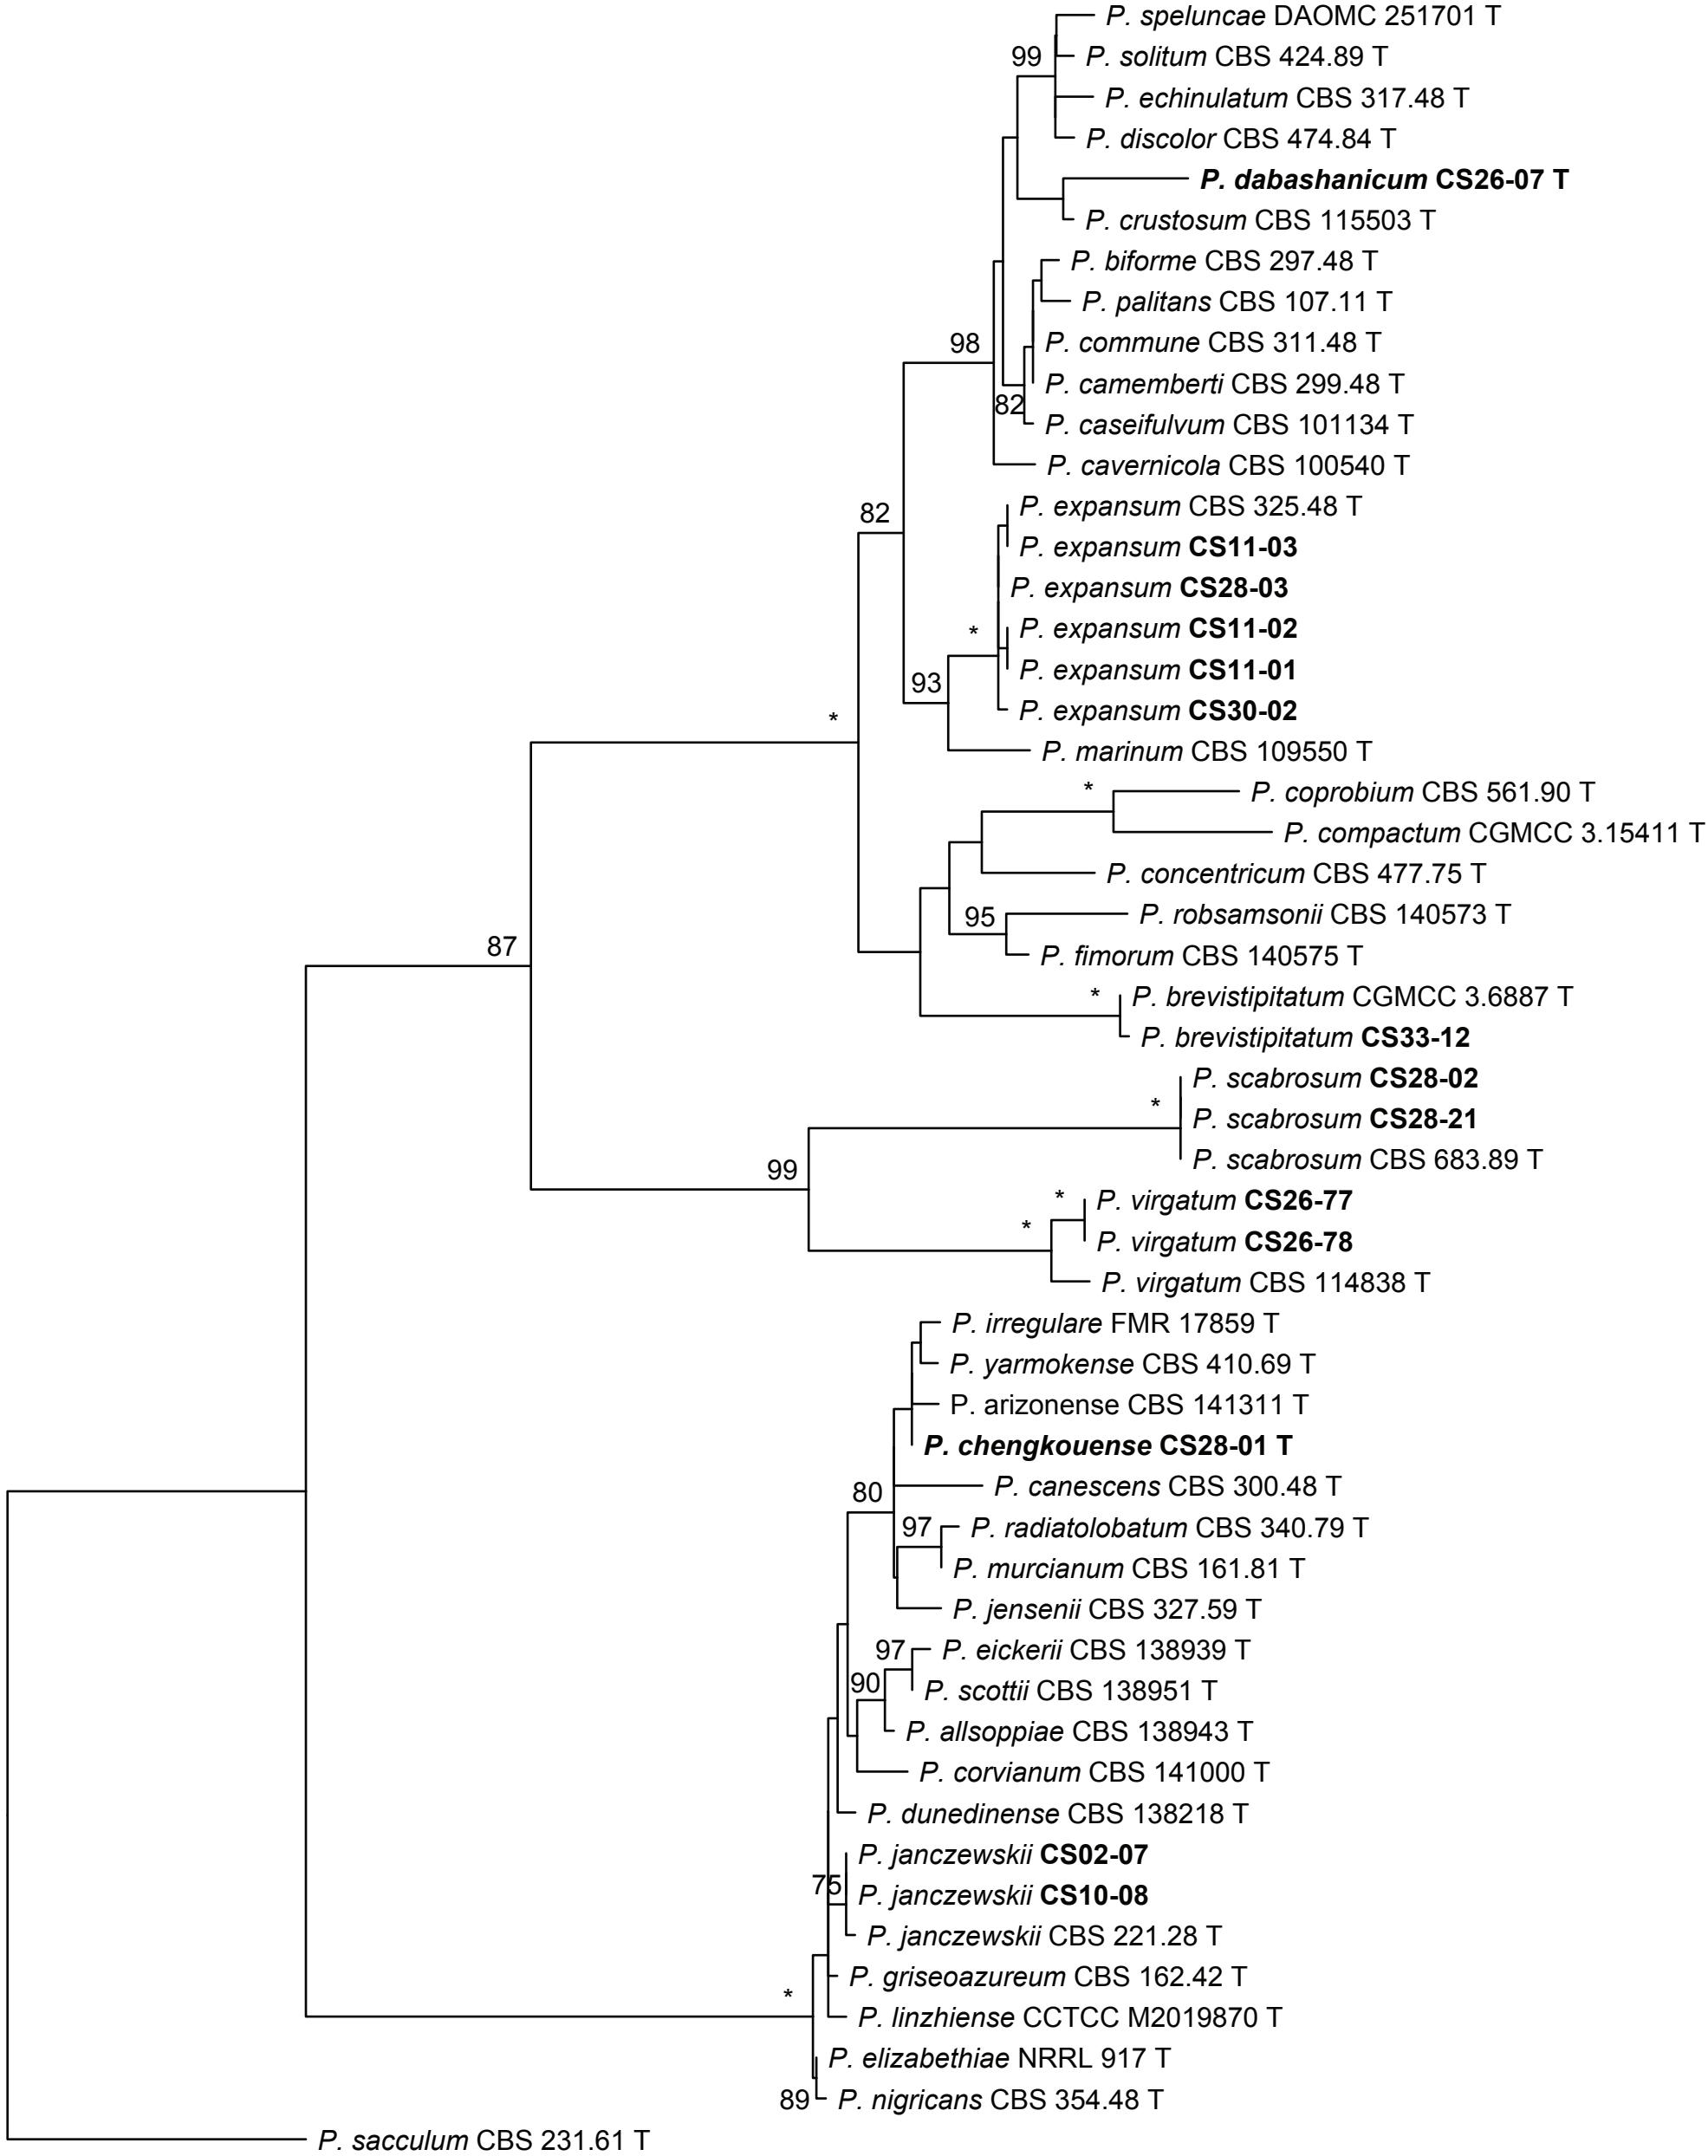

Supplement: s1 [file s1]
